# Supplementary material
Source: PubMed Central journal article supplement (PMC10568978)

A Admixture=0

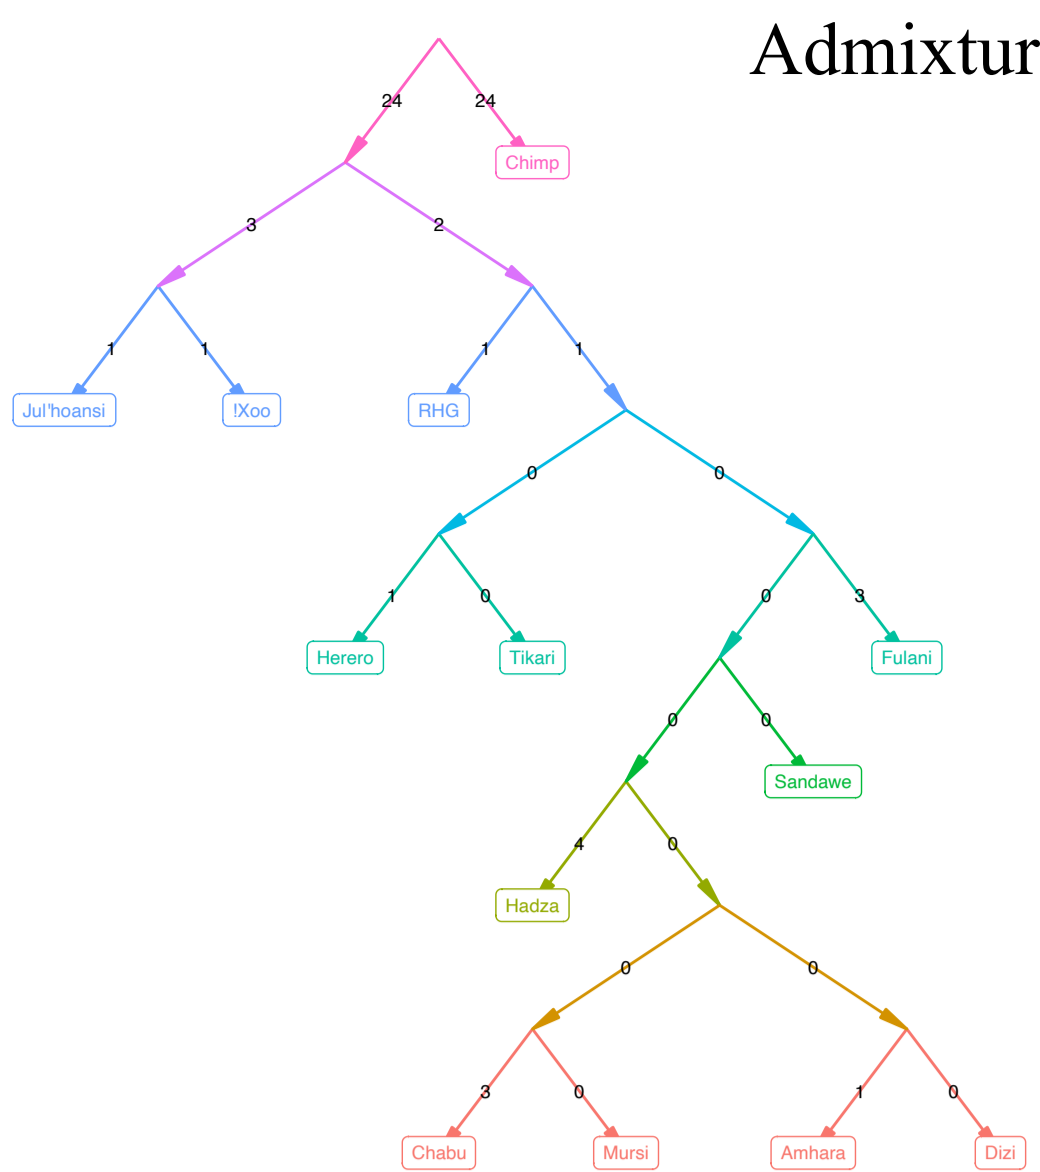

B Admixture=1

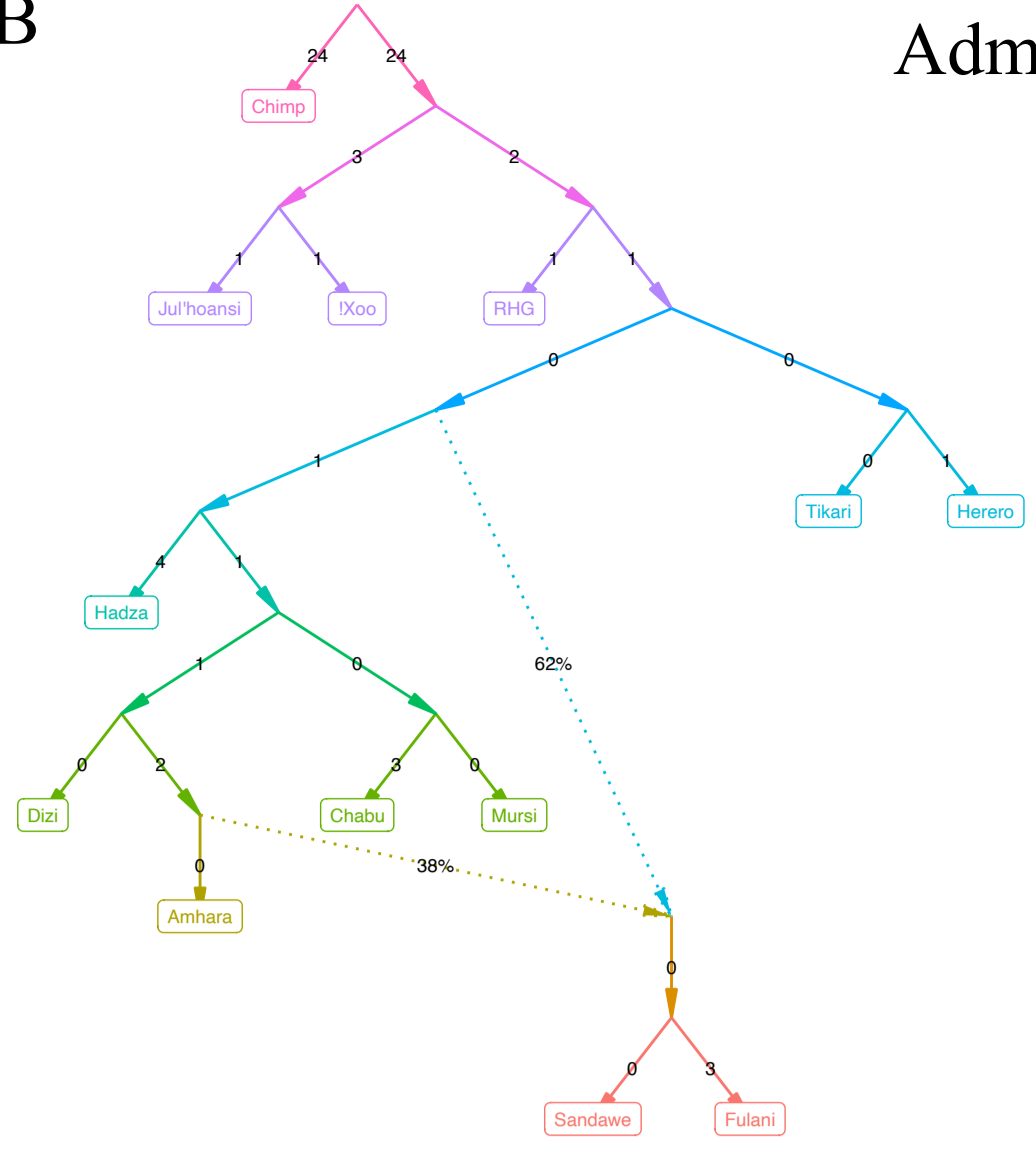

C Admixture=2

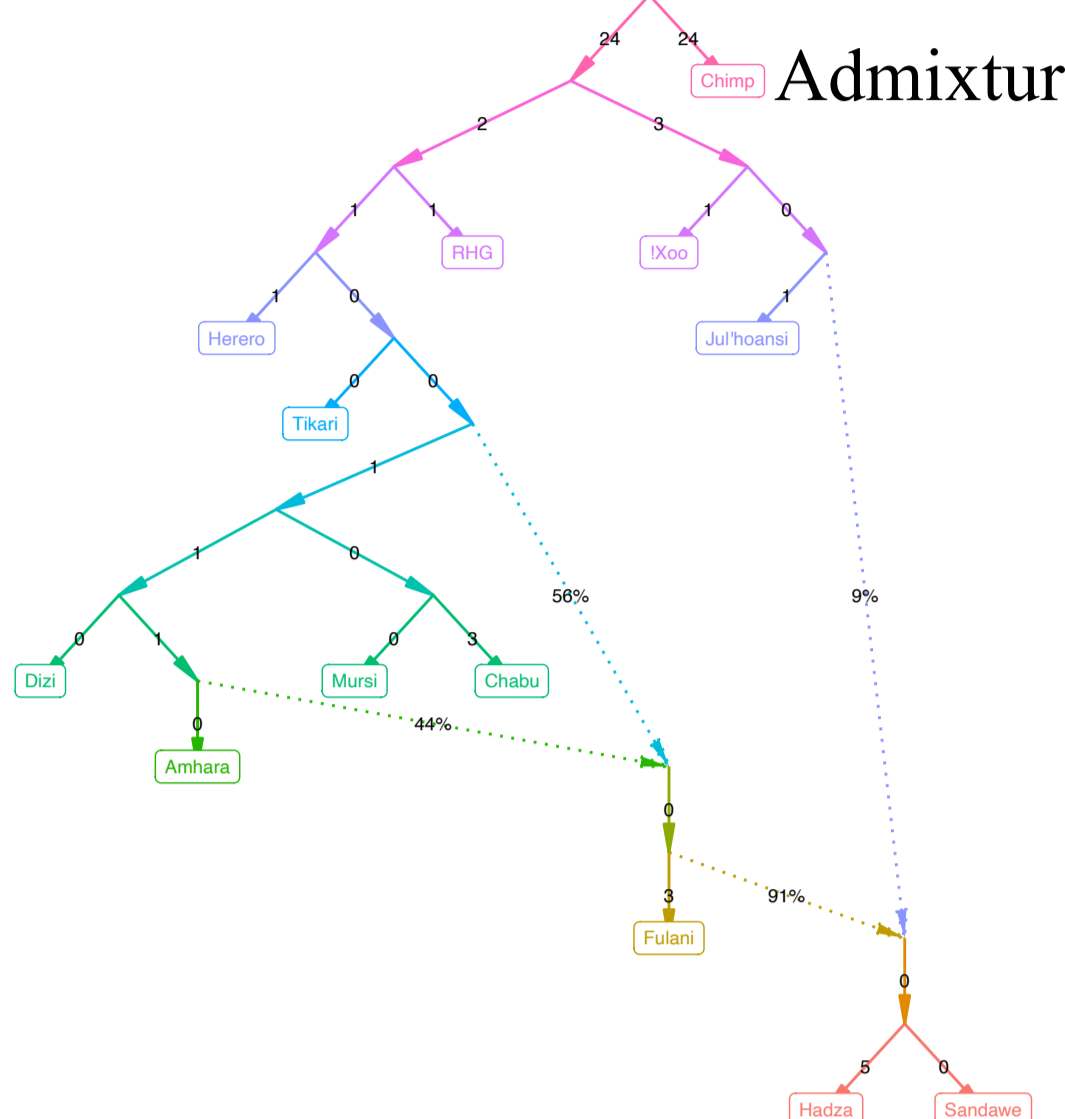

D Admixture=3

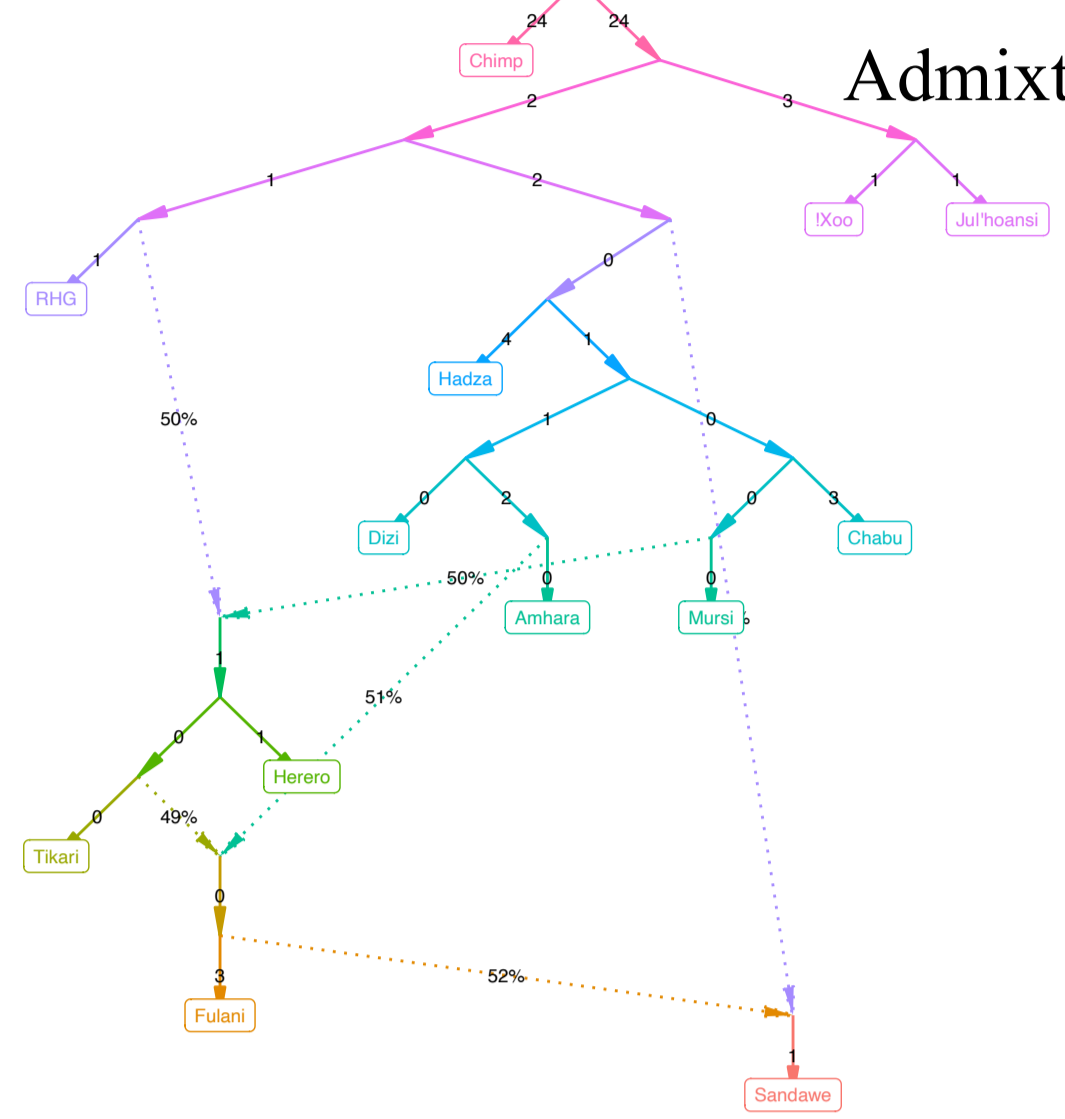

E Admixture=4

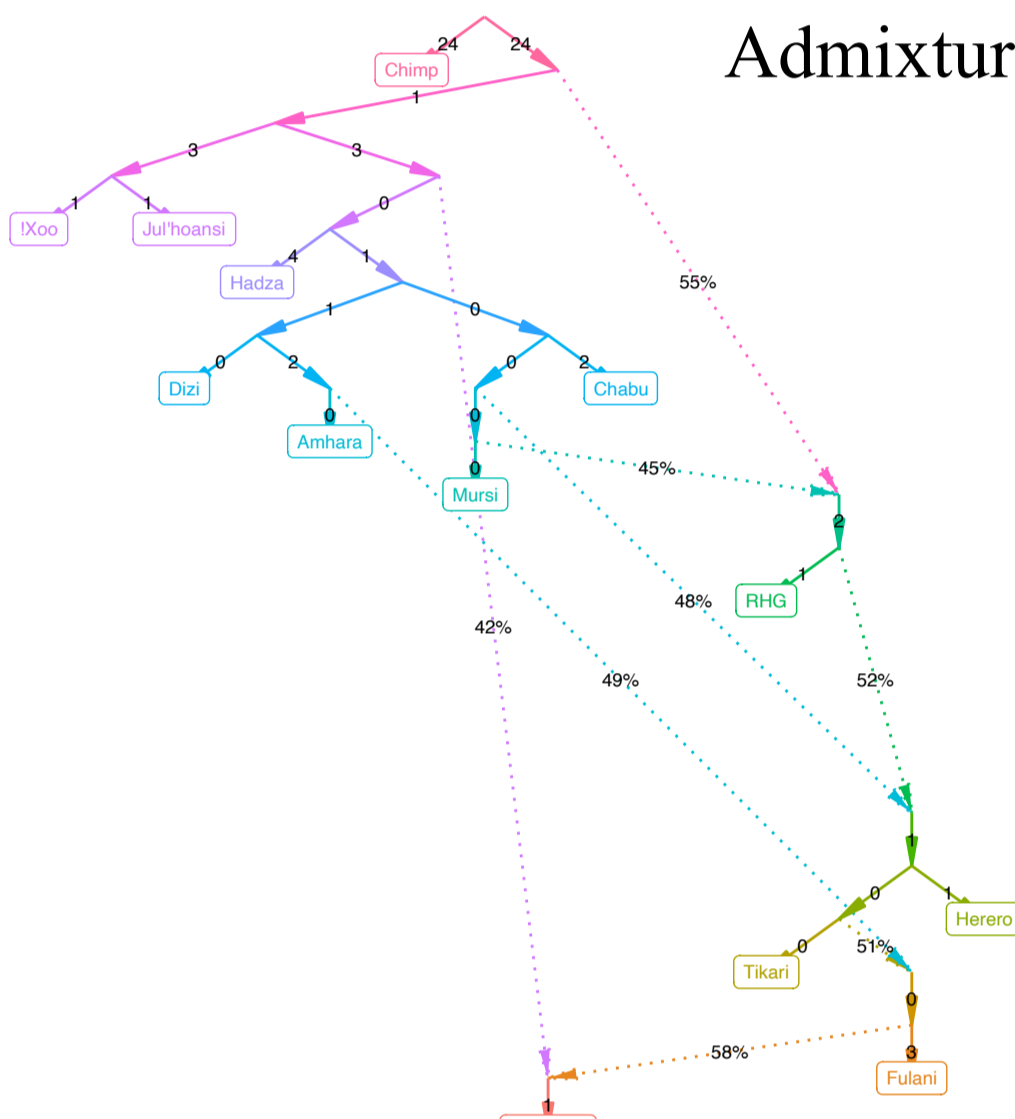

F Admixture=5

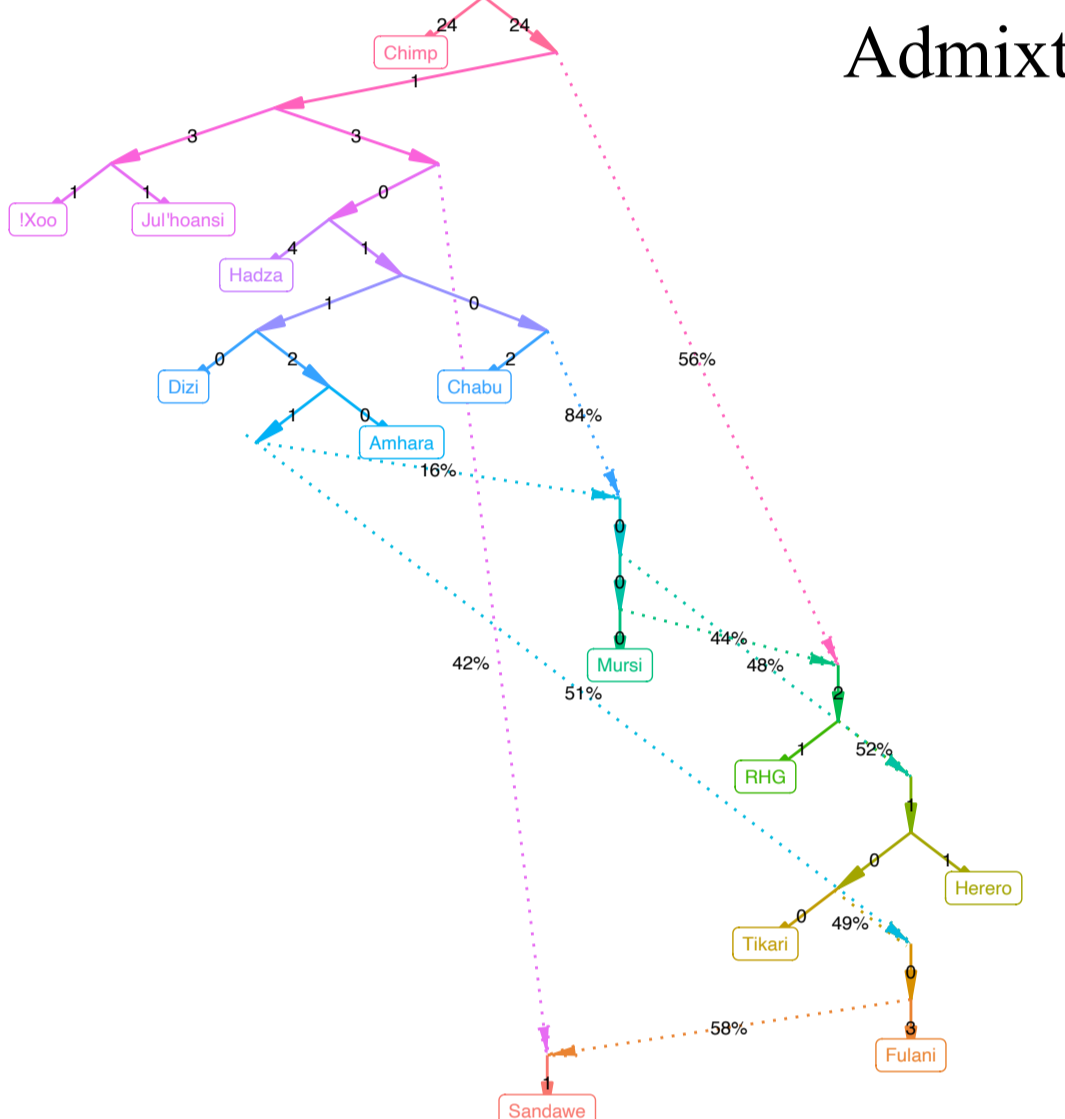

G Admixture=6

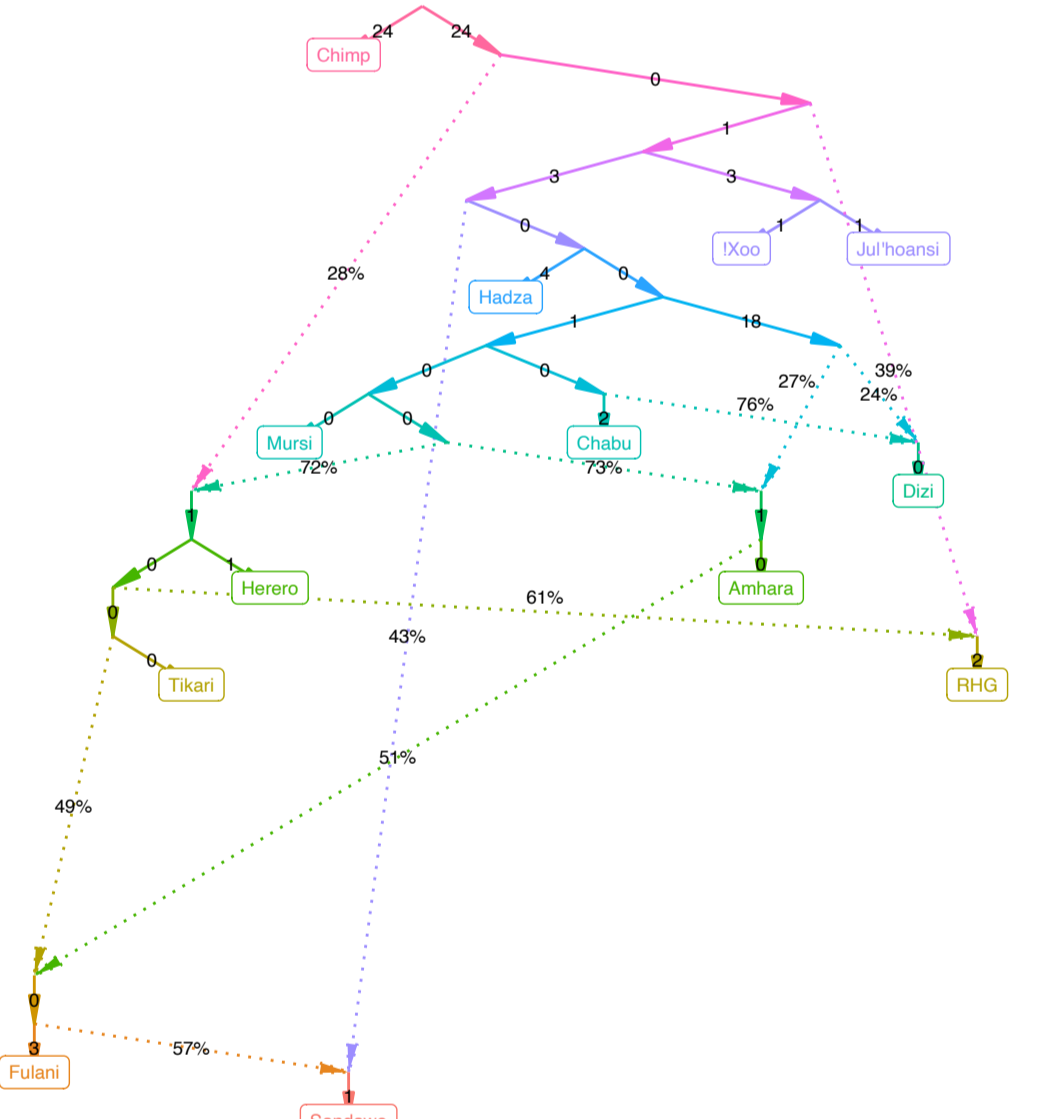

H Admixture=7

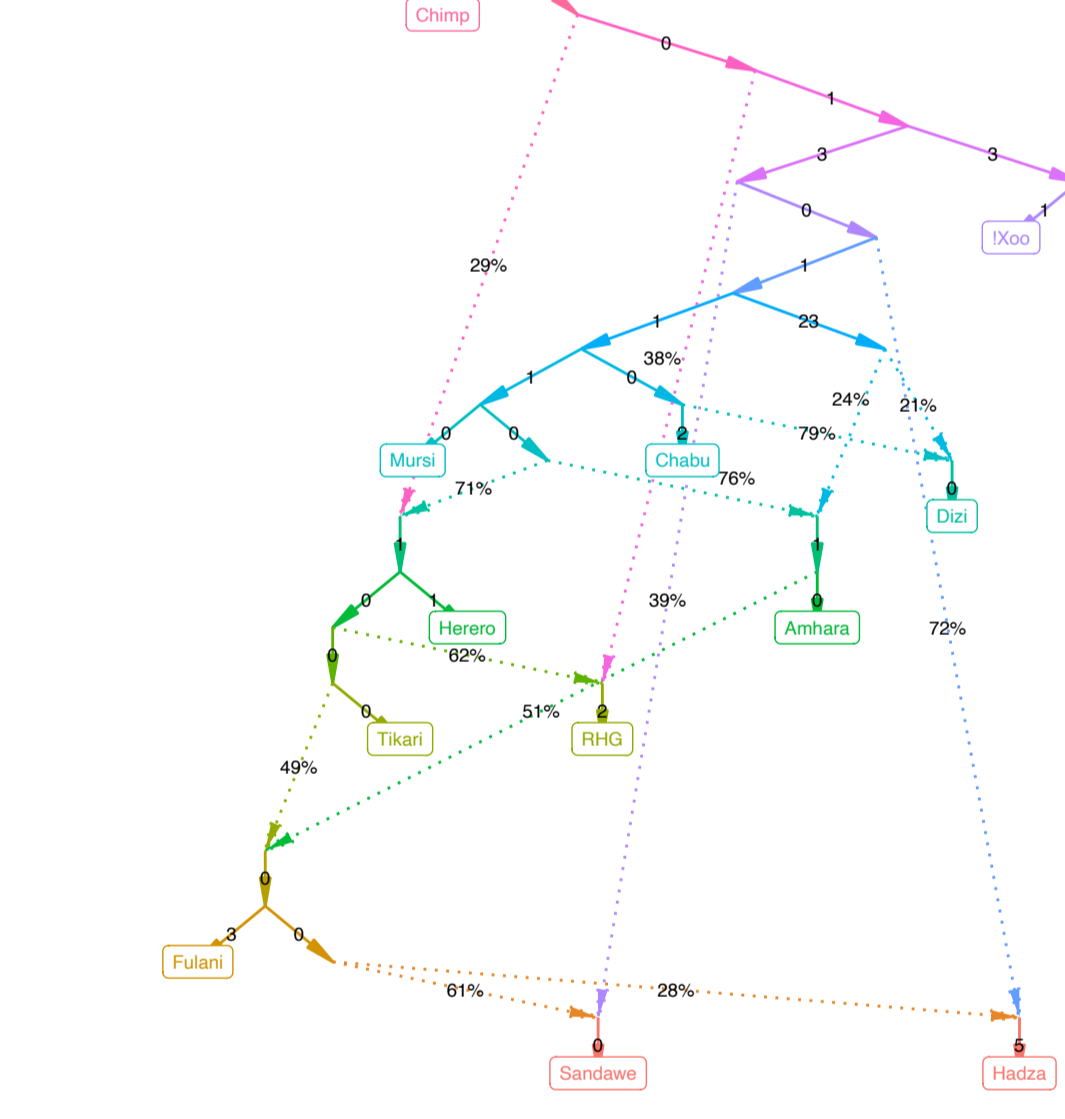

I Admixture=8

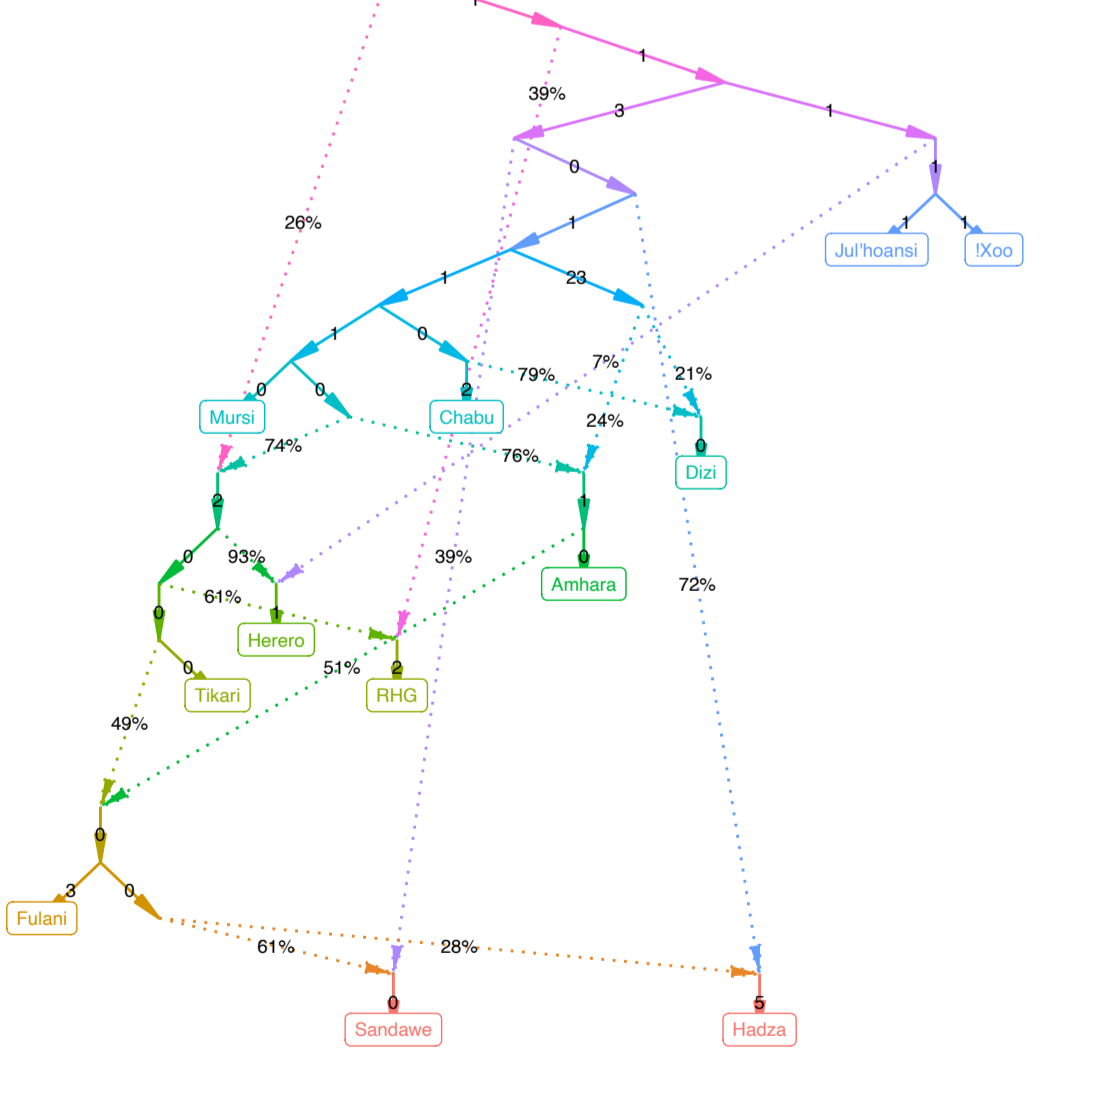

J Admixture=9

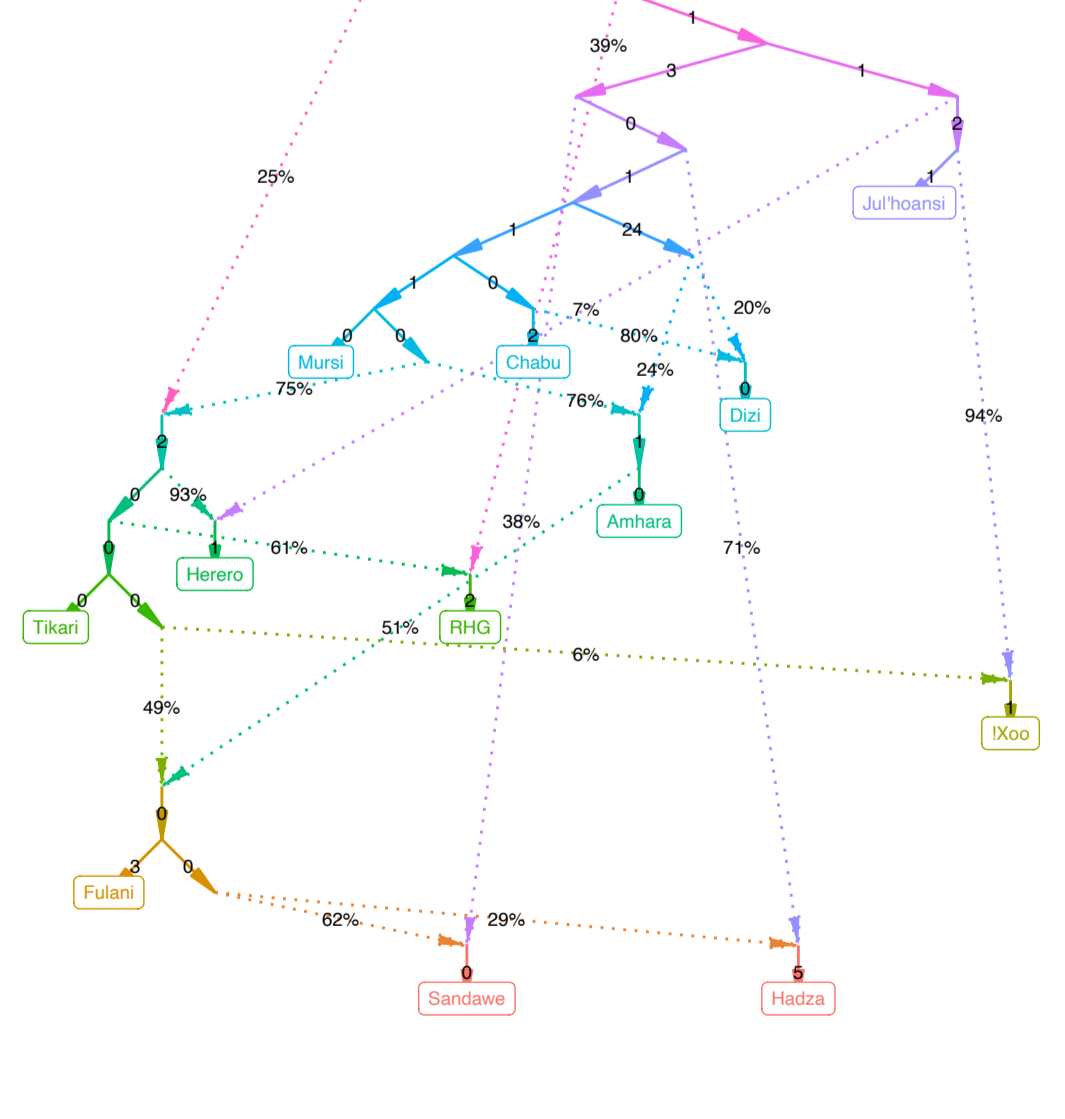

K Admixture=10

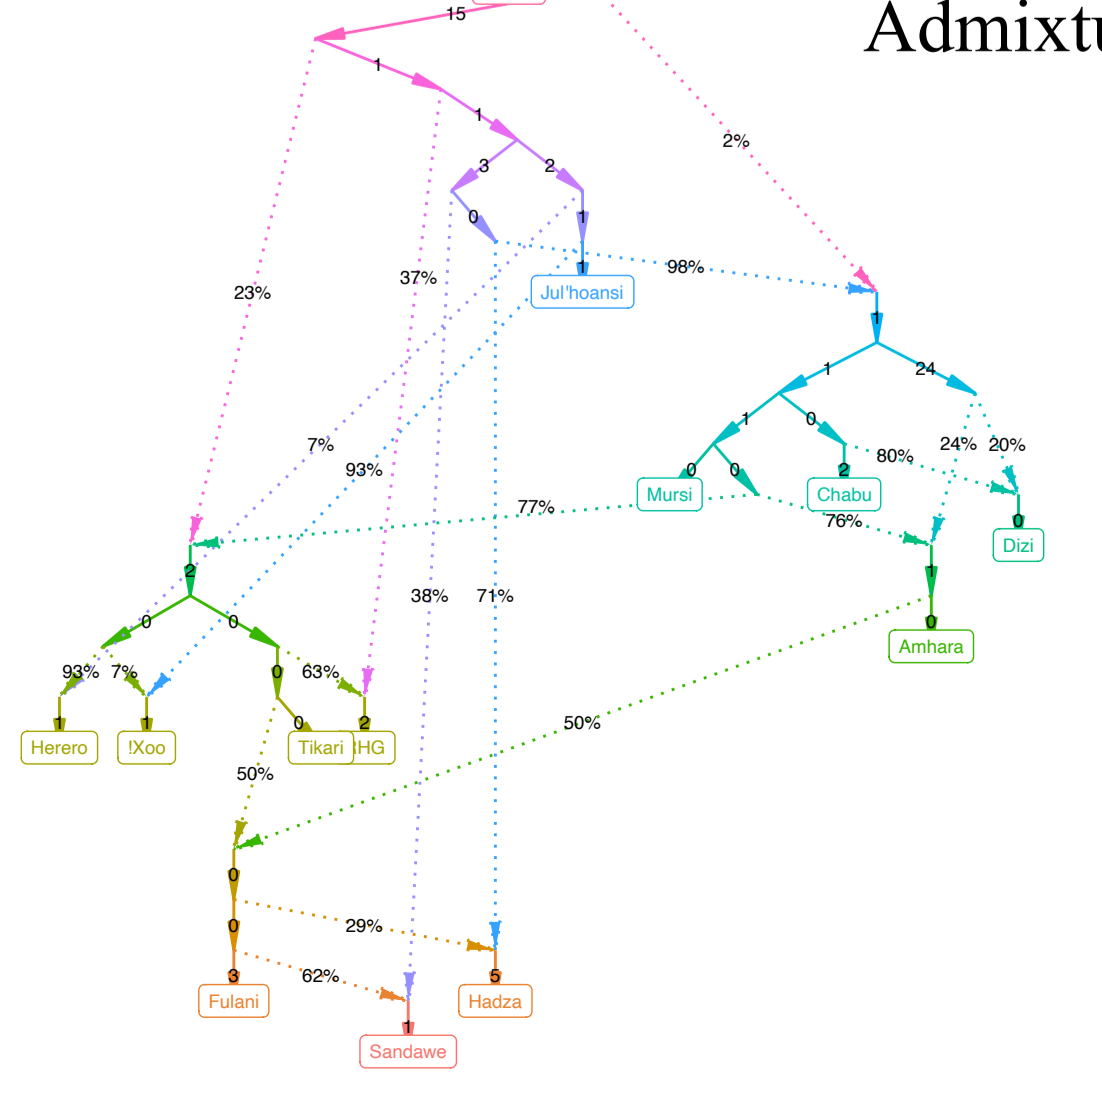

L Admixture=11

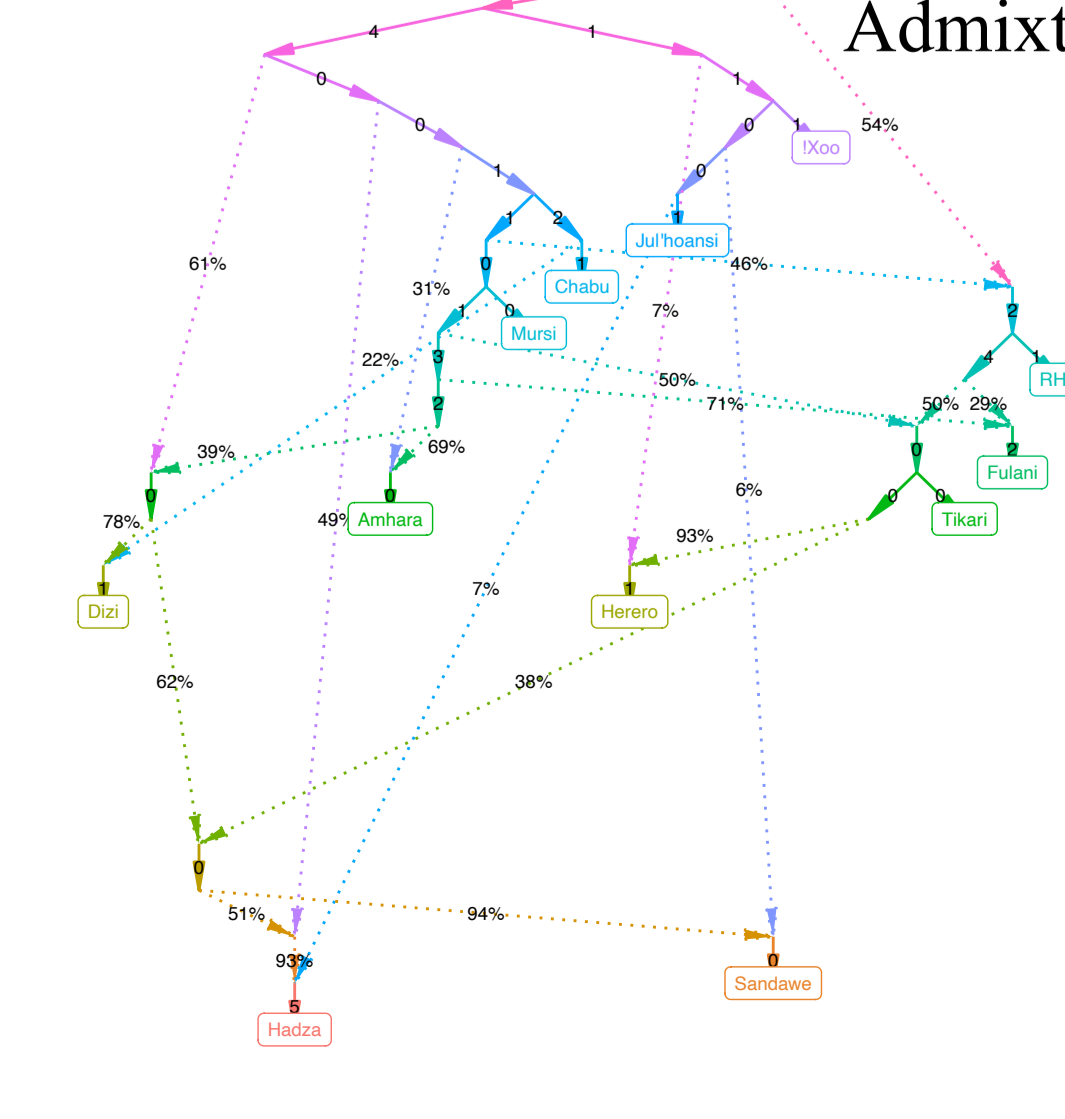

Supplement: NIHMS1878951-supplement-5.pdf [file NIHMS1878951-supplement-5.pdf]
