# Supplementary material
Source: PubMed Central journal article supplement (PMC10568978)

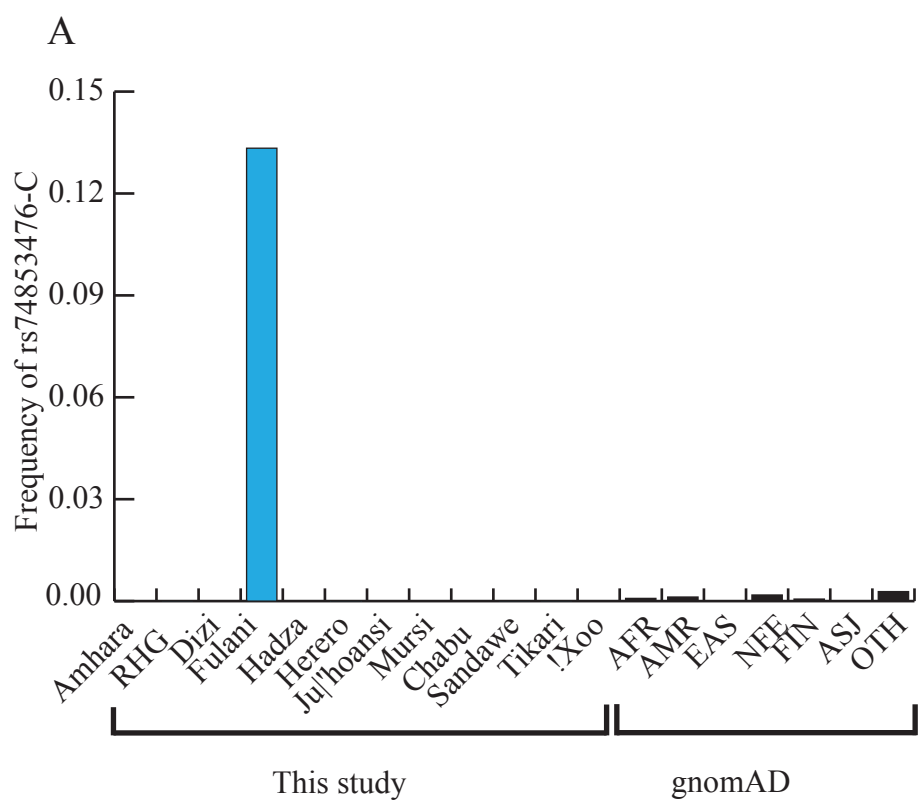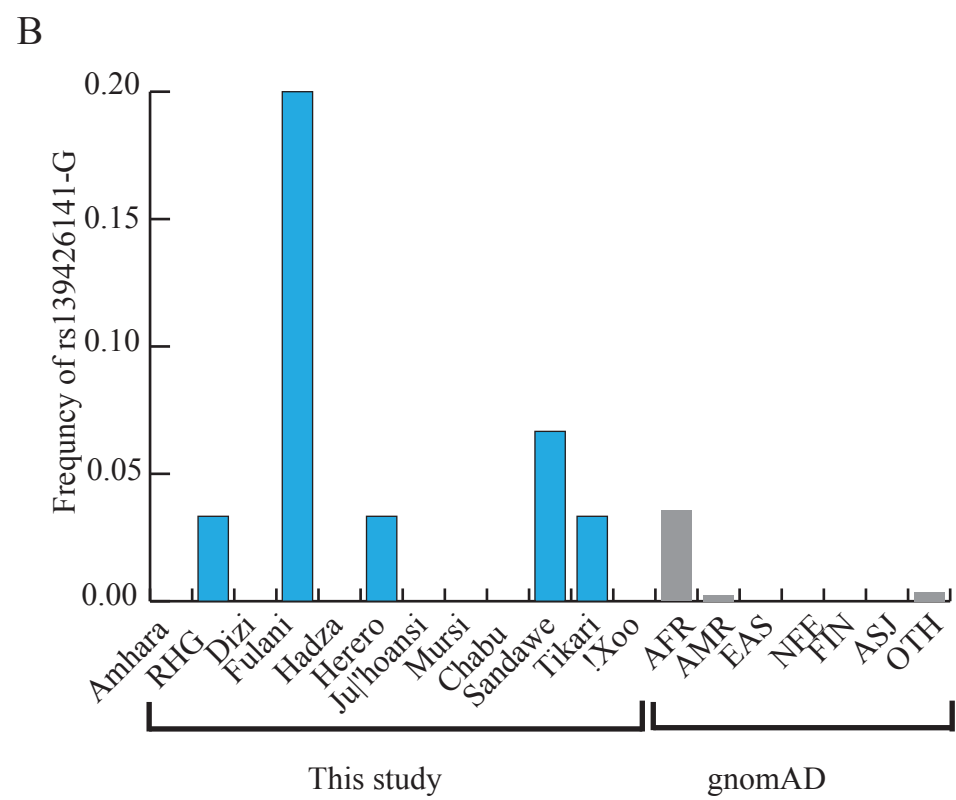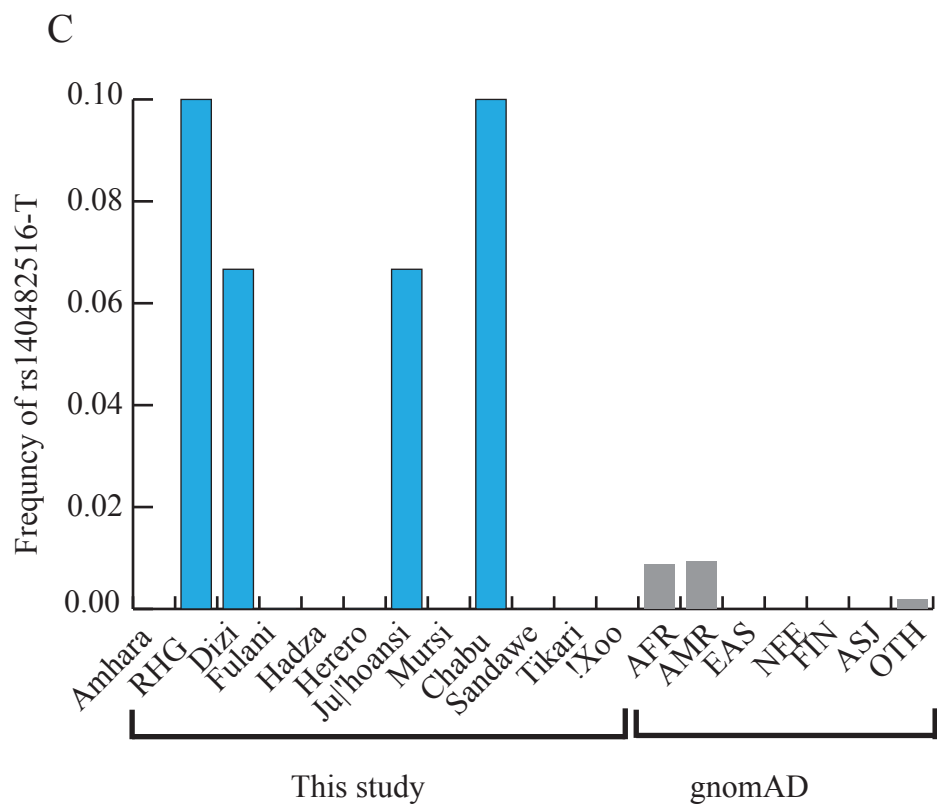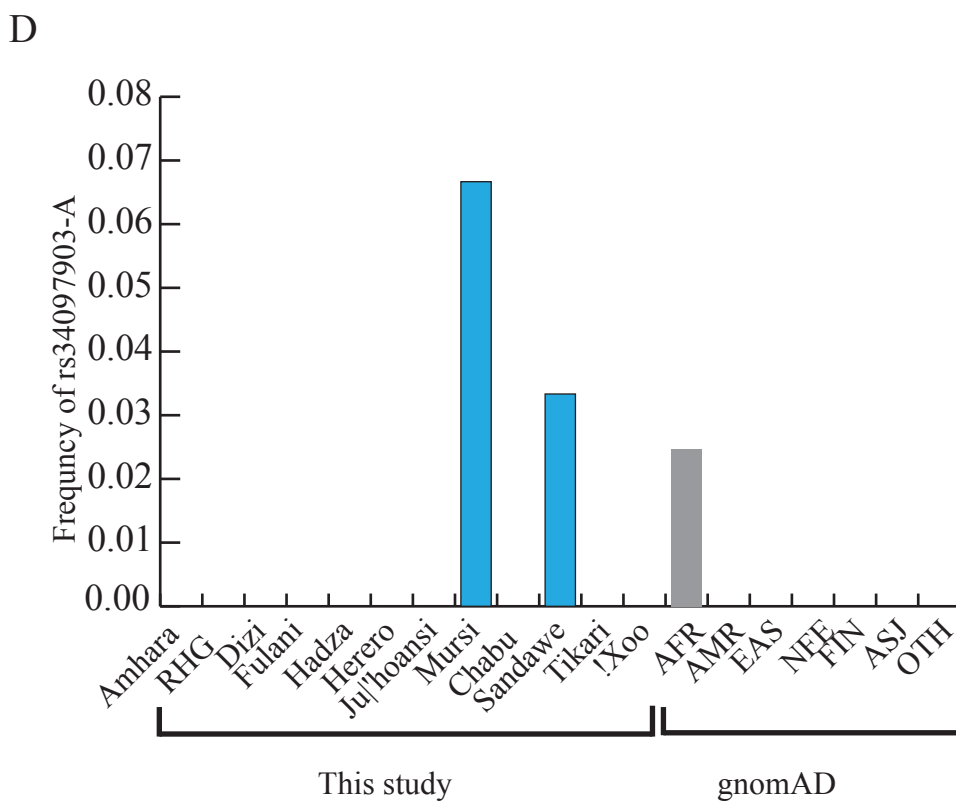

Supplement: NIHMS1878951-supplement-2.pdf [file NIHMS1878951-supplement-2.pdf]

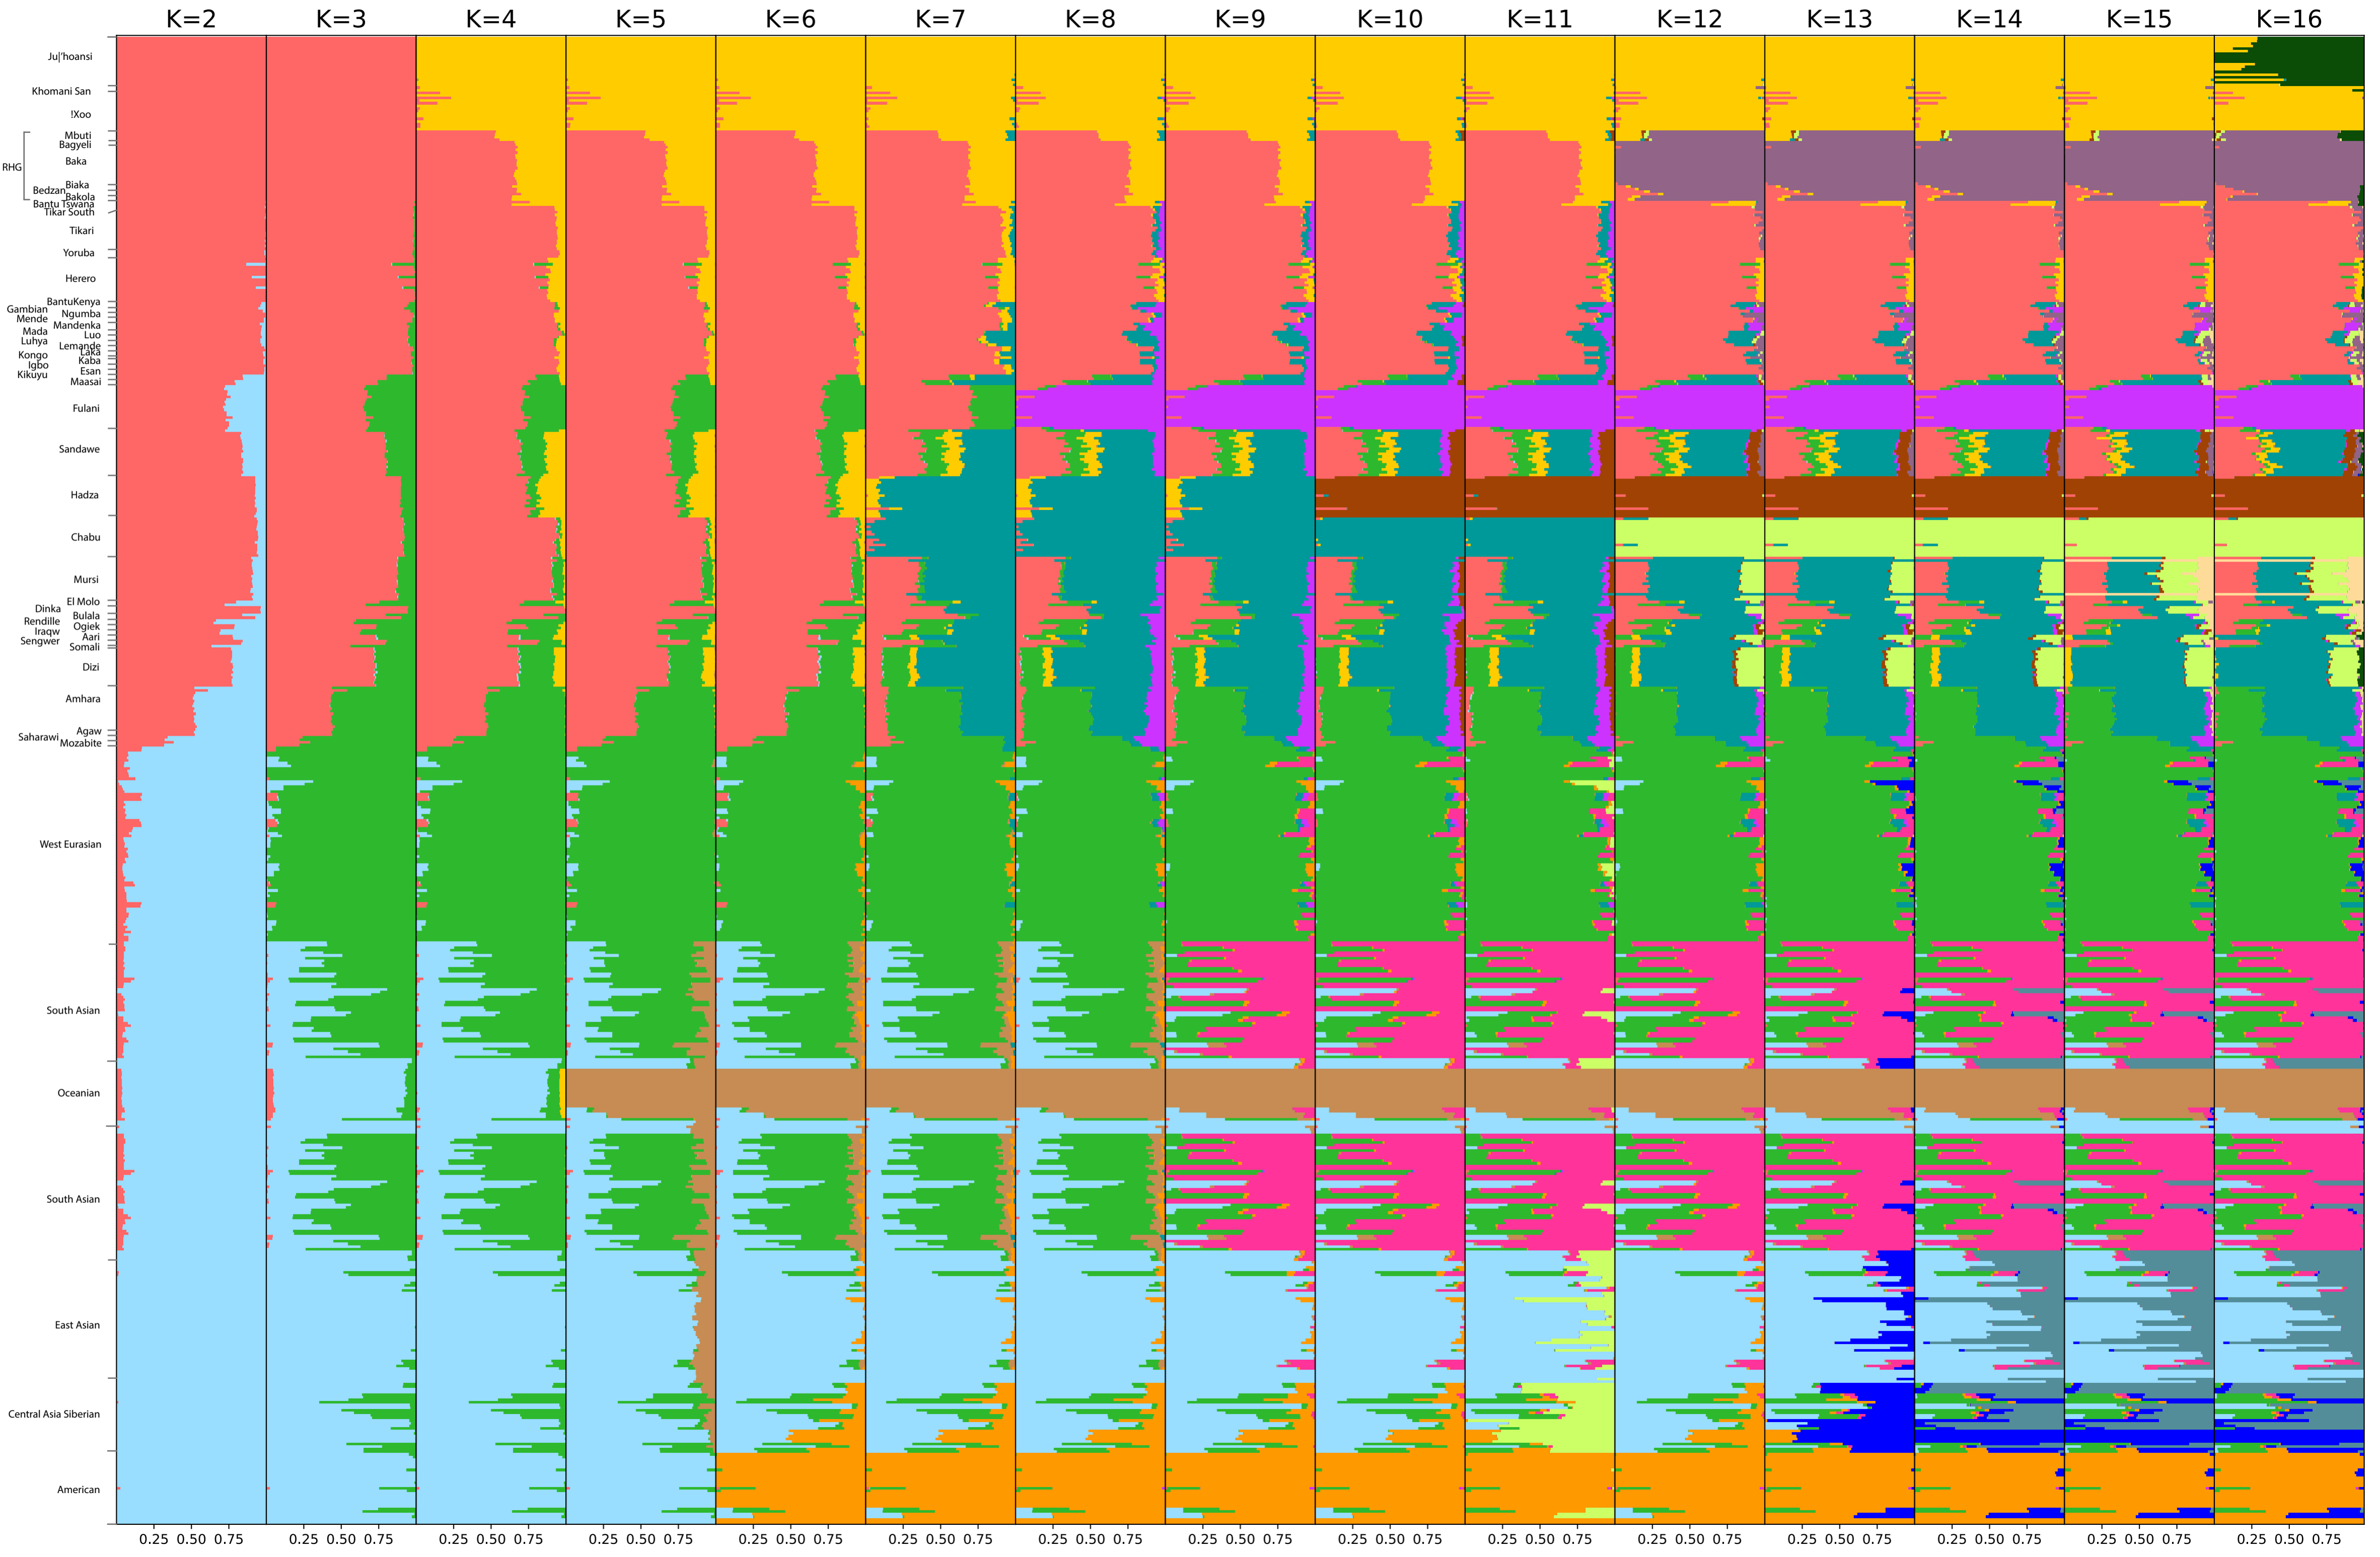

Supplement: NIHMS1878951-supplement-3.pdf [file NIHMS1878951-supplement-3.pdf]

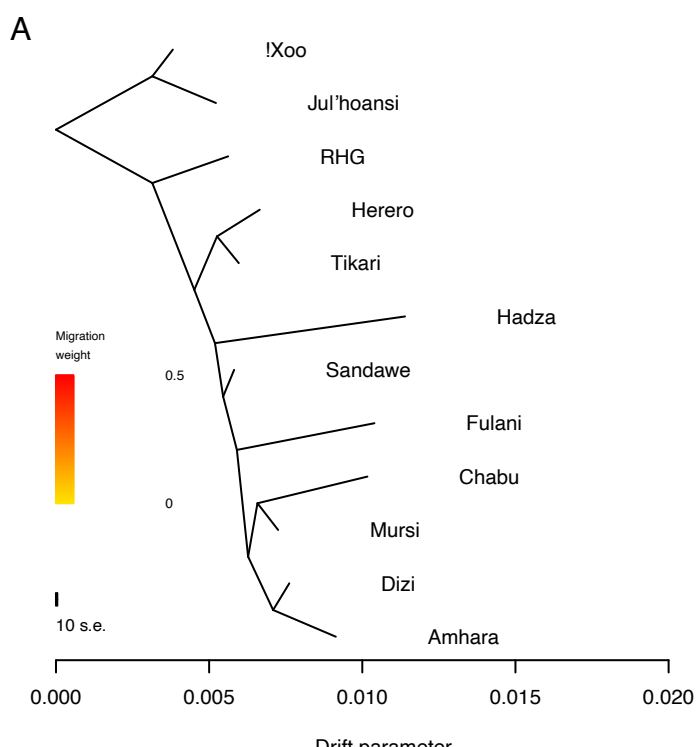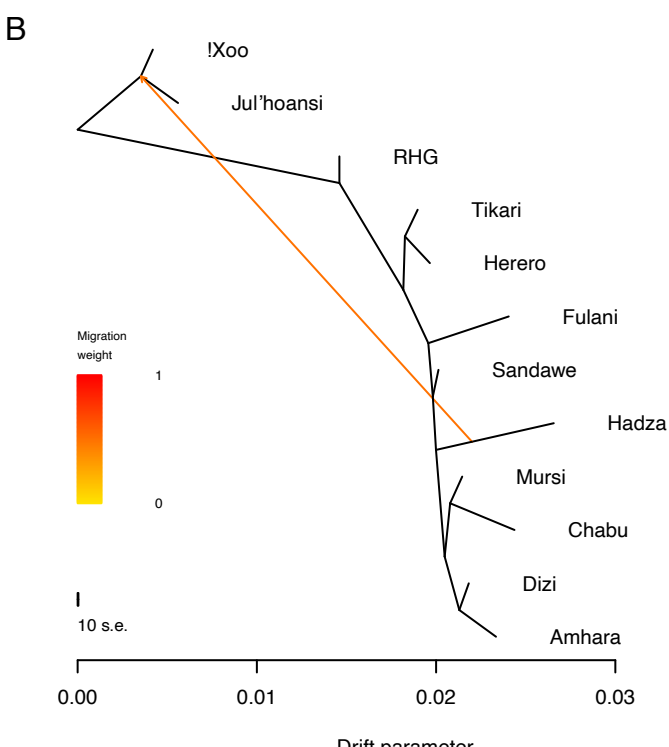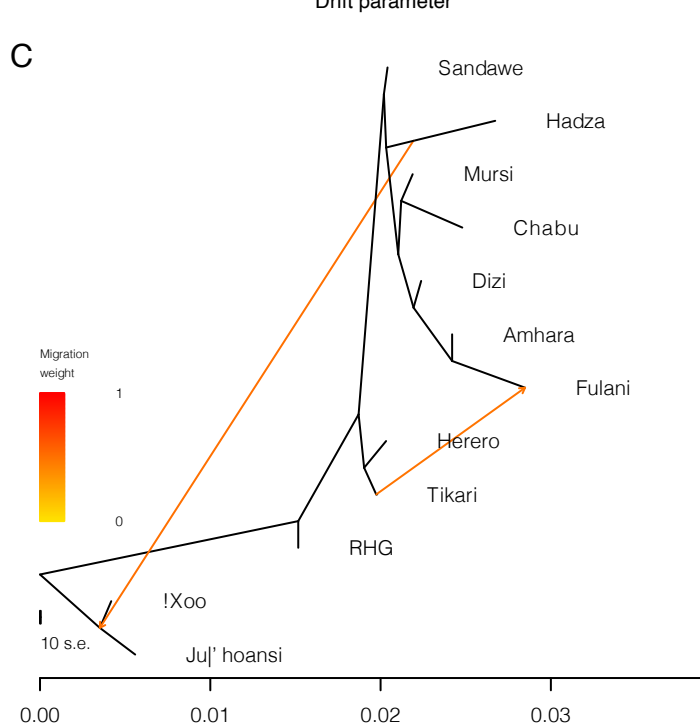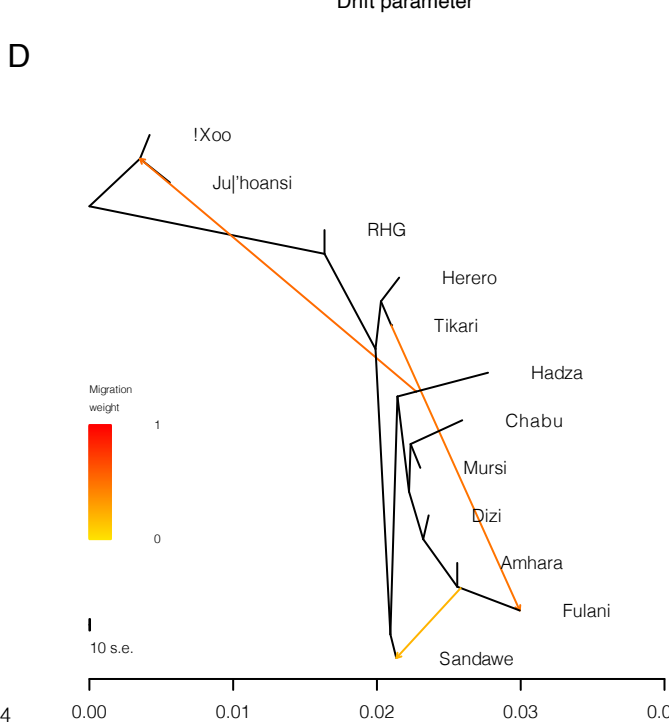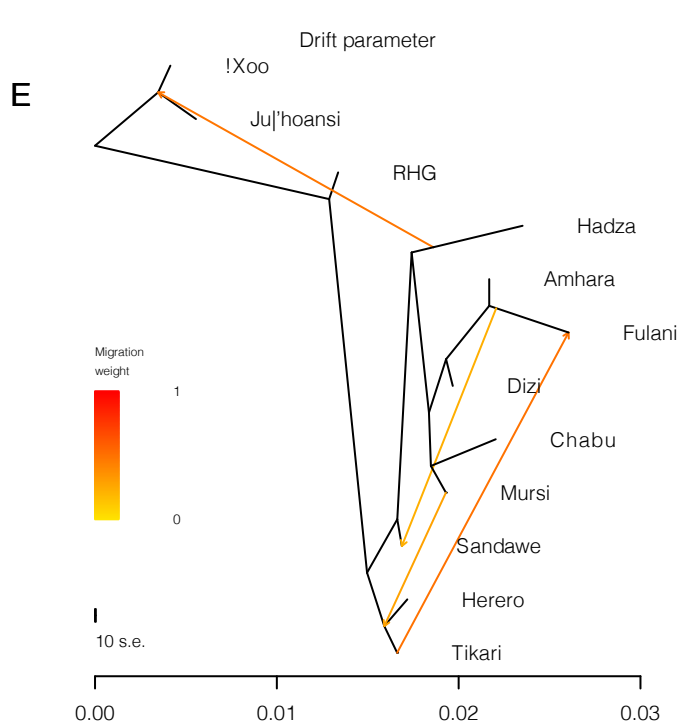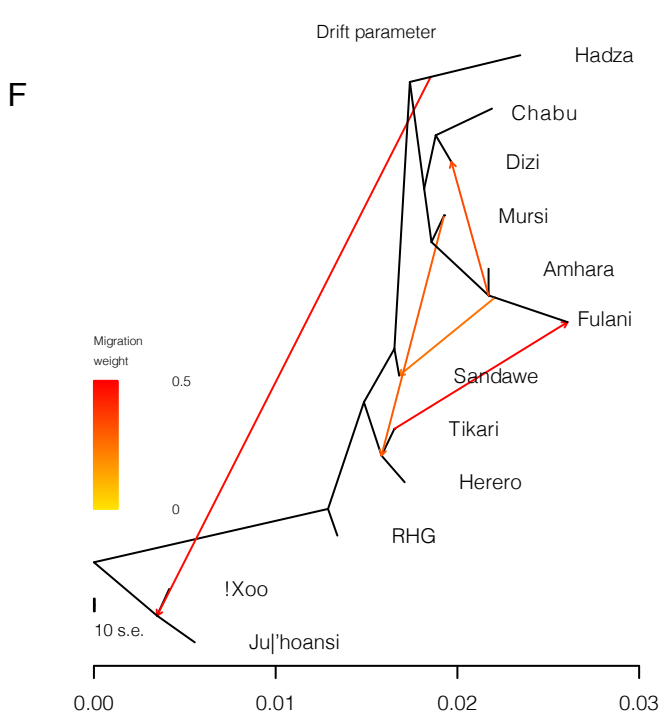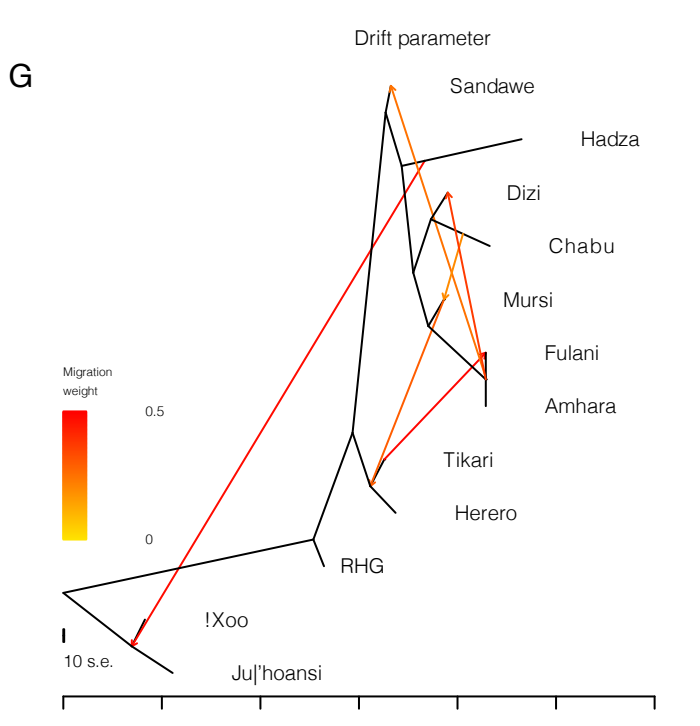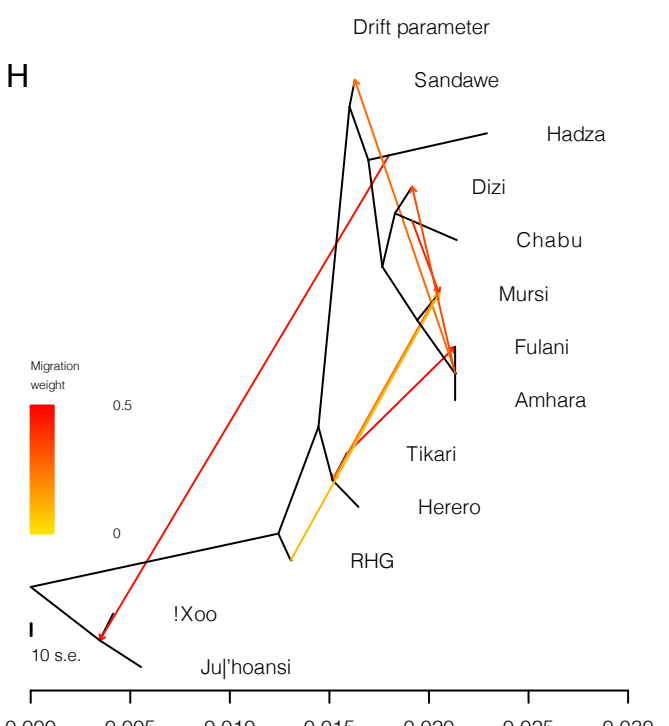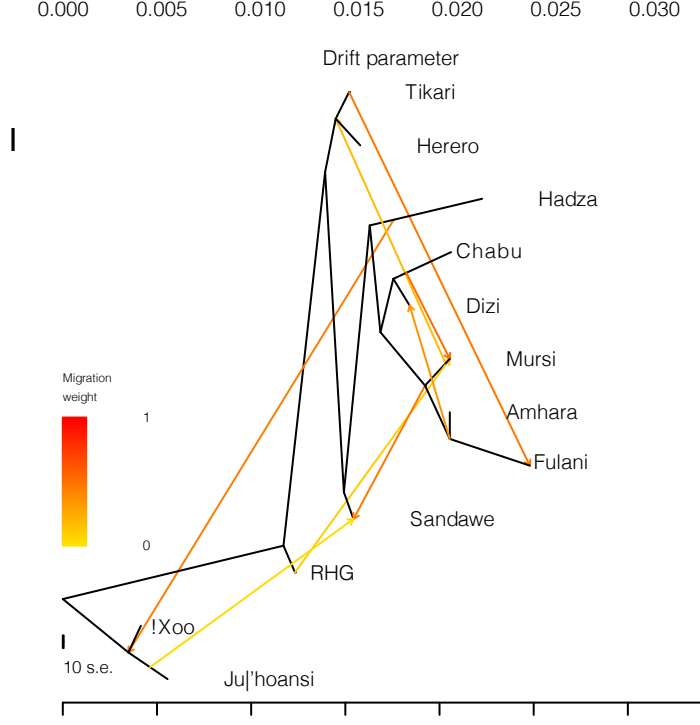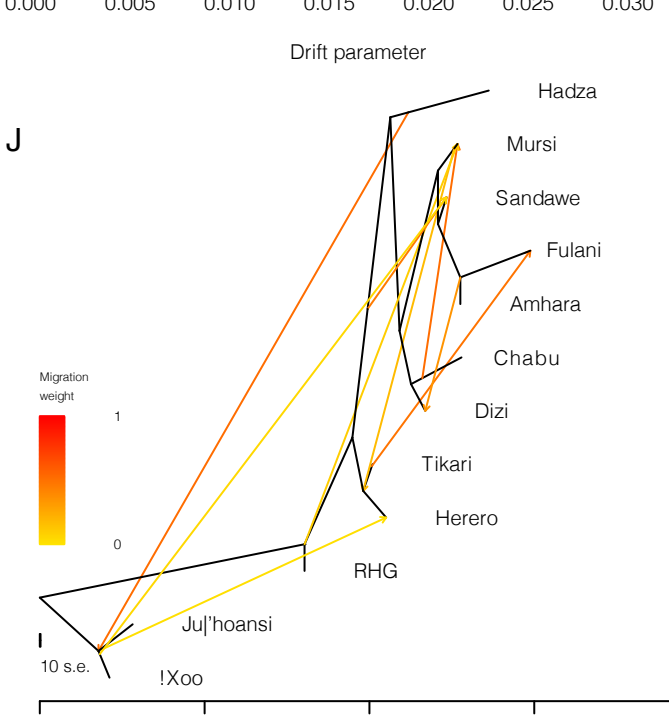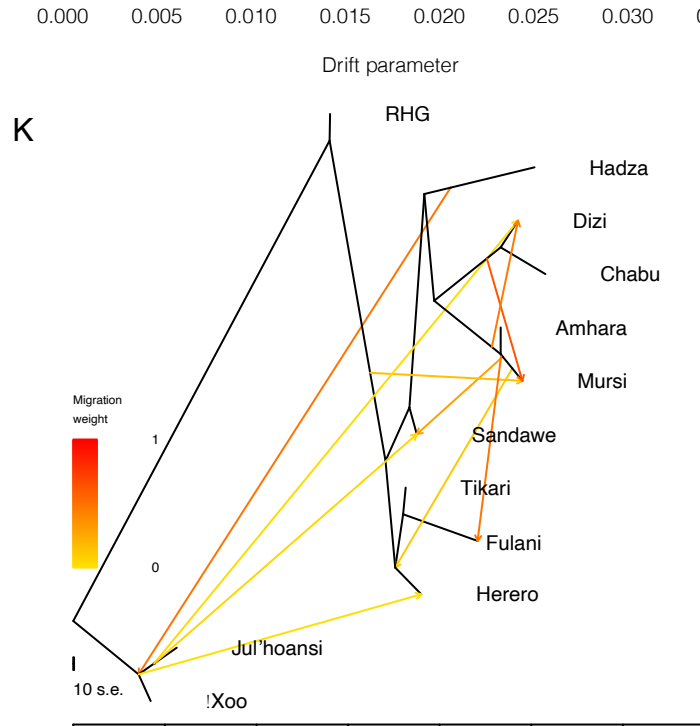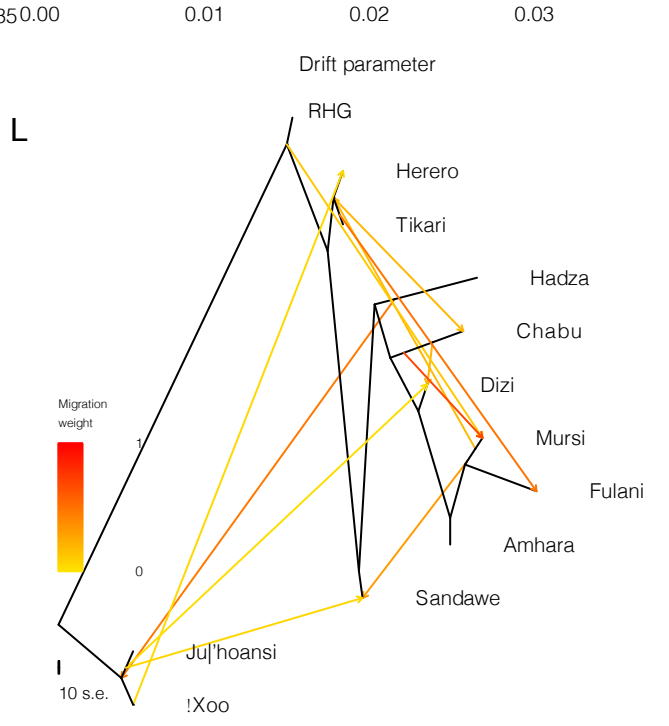

Supplement: NIHMS1878951-supplement-4.pdf [file NIHMS1878951-supplement-4.pdf]

**A**

Log Likelihood = -3.3349E+07

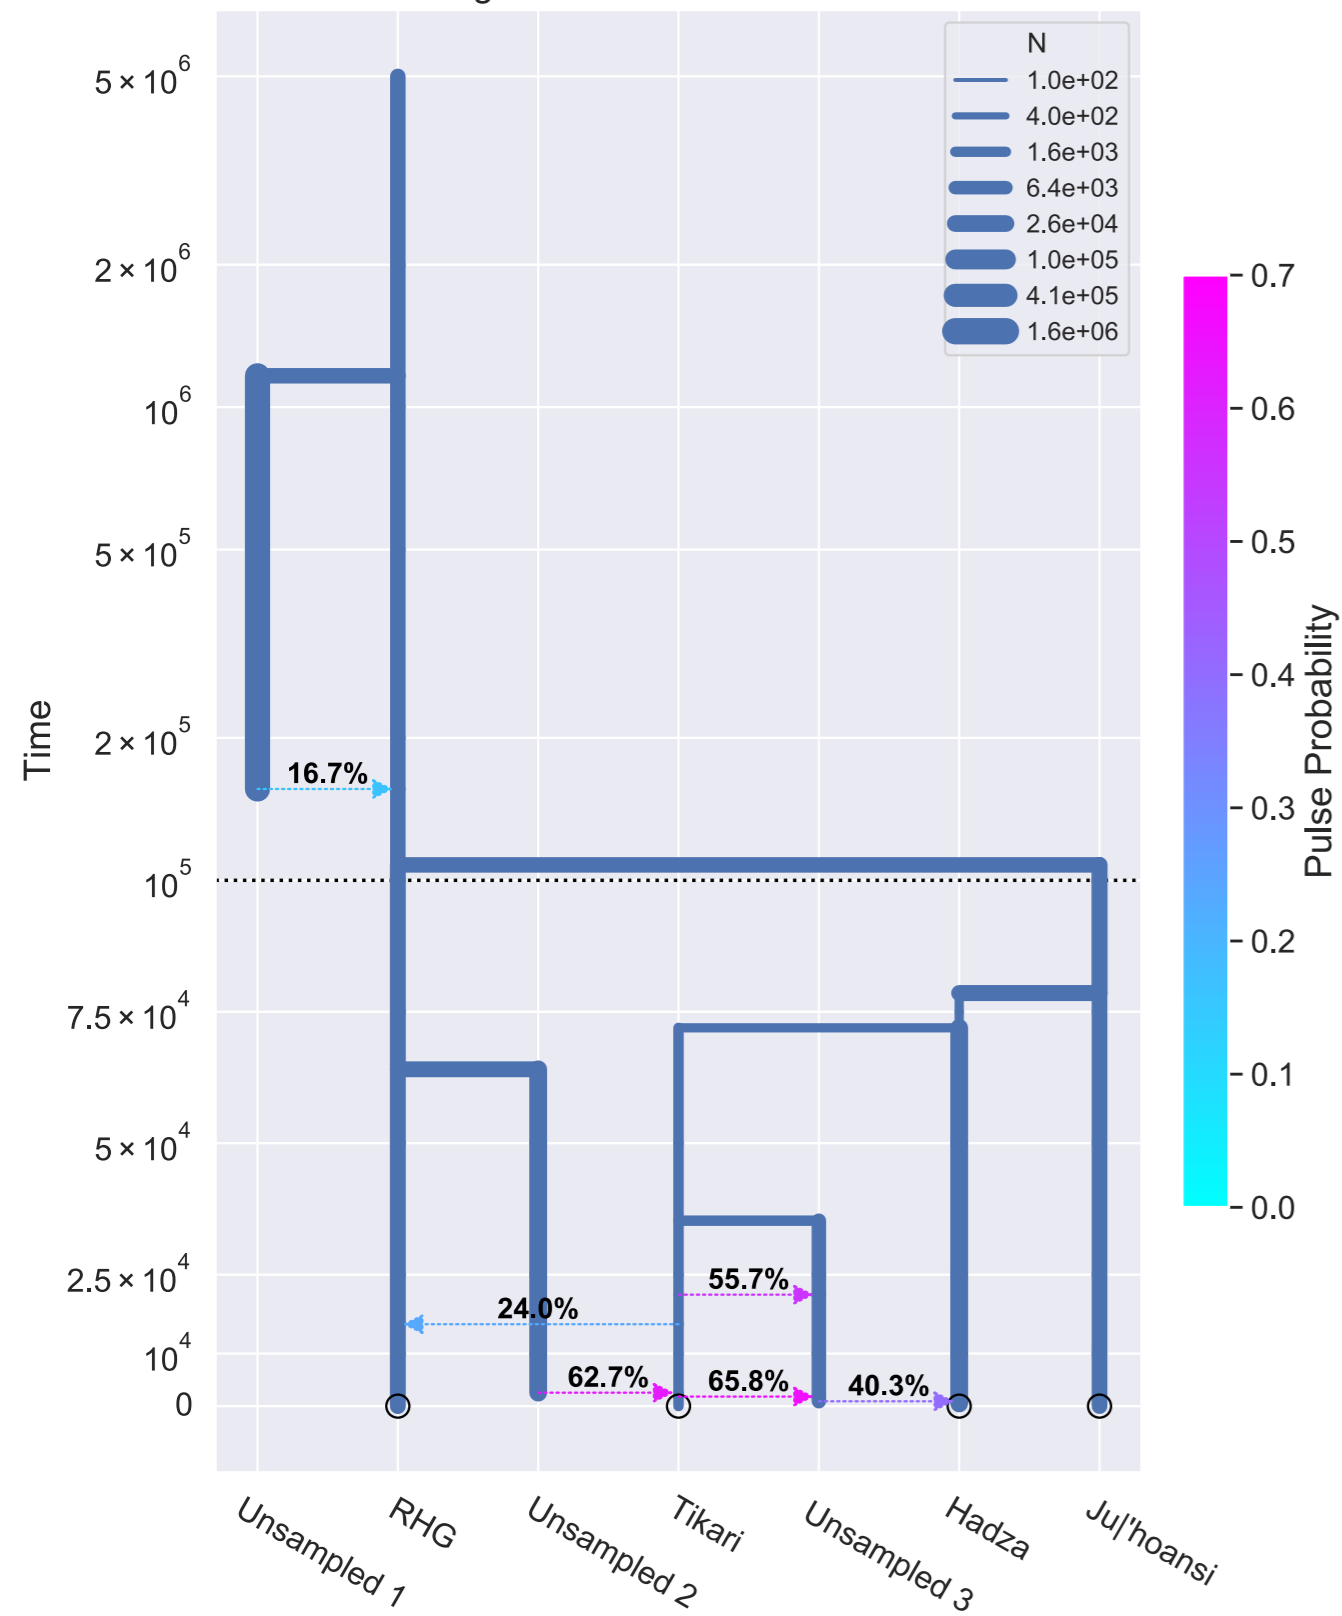**B**

Log Likelihood = -3.3348E+07

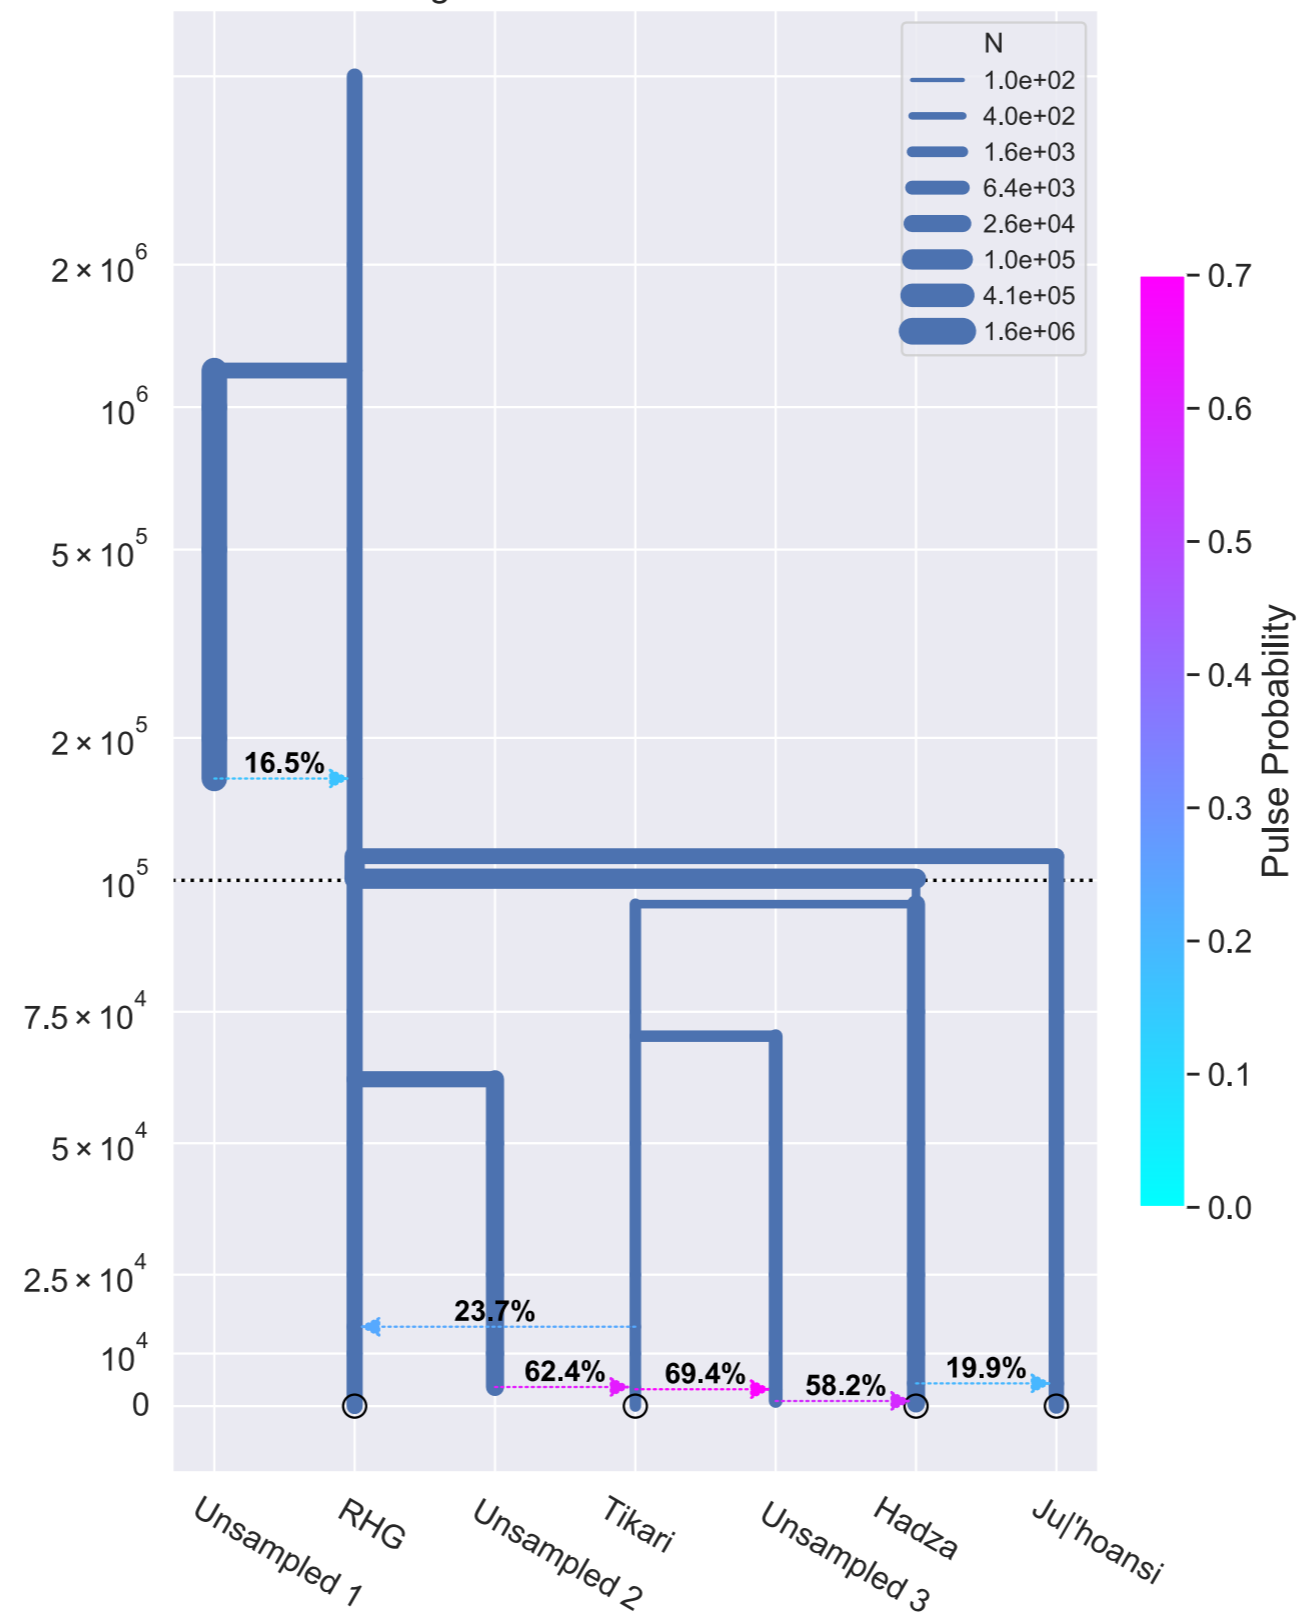**C**

Log Likelihood = -3.3346E+07

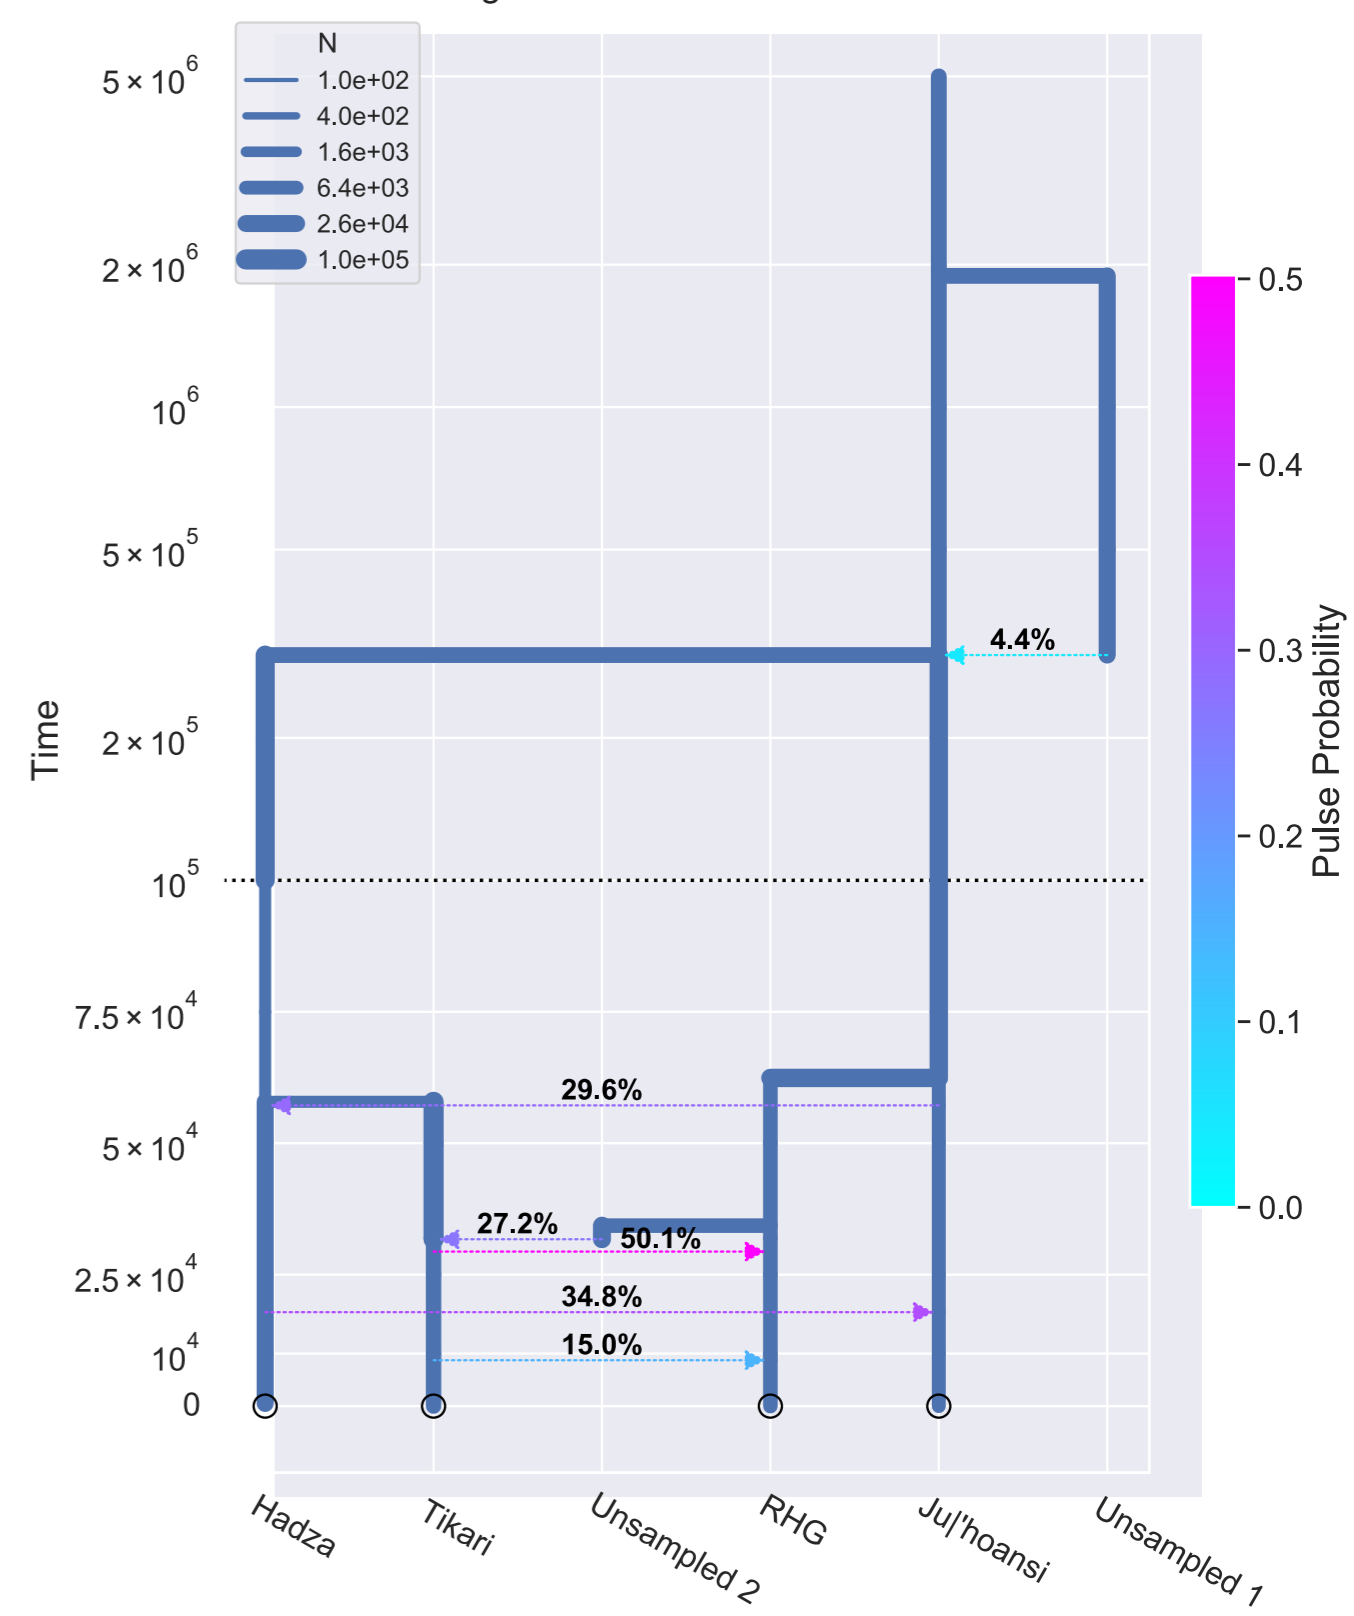

Supplement: NIHMS1878951-supplement-6.pdf [file NIHMS1878951-supplement-6.pdf]

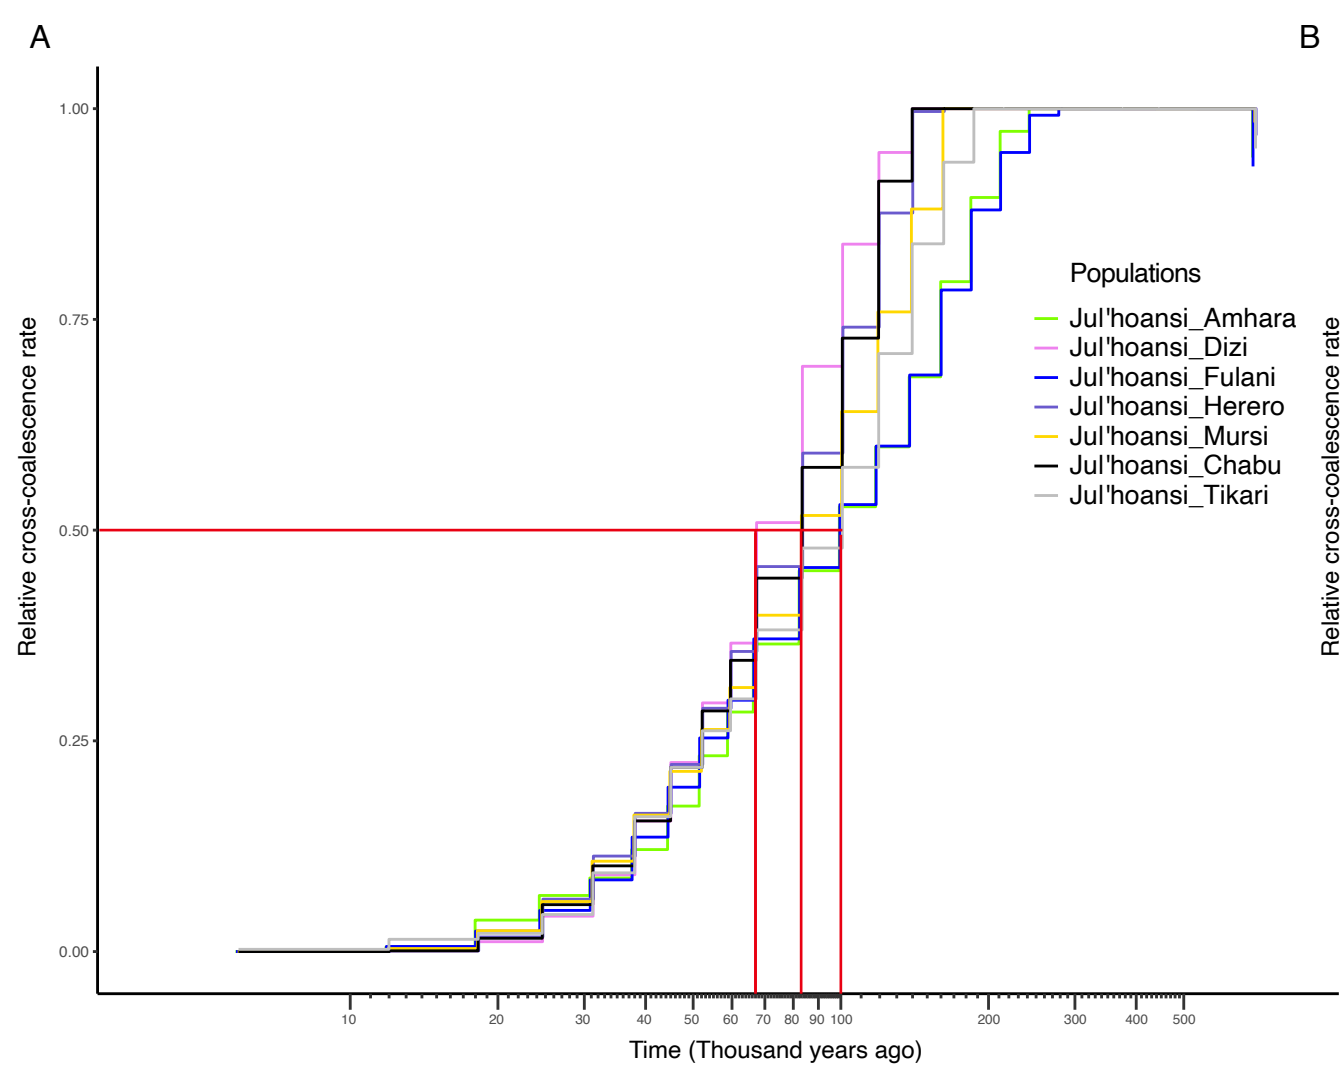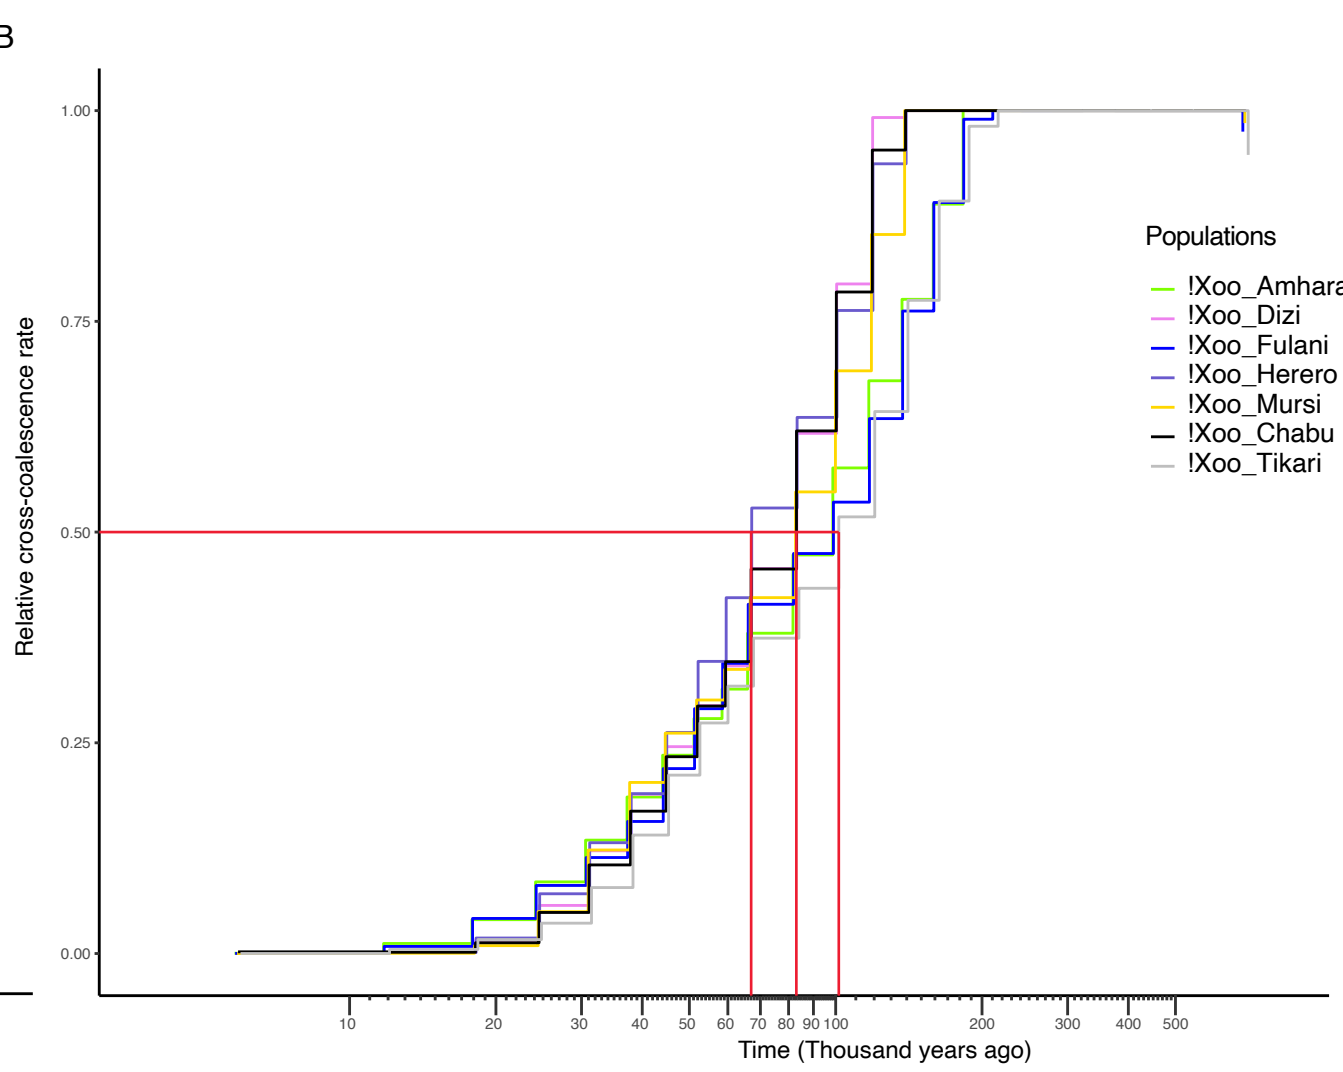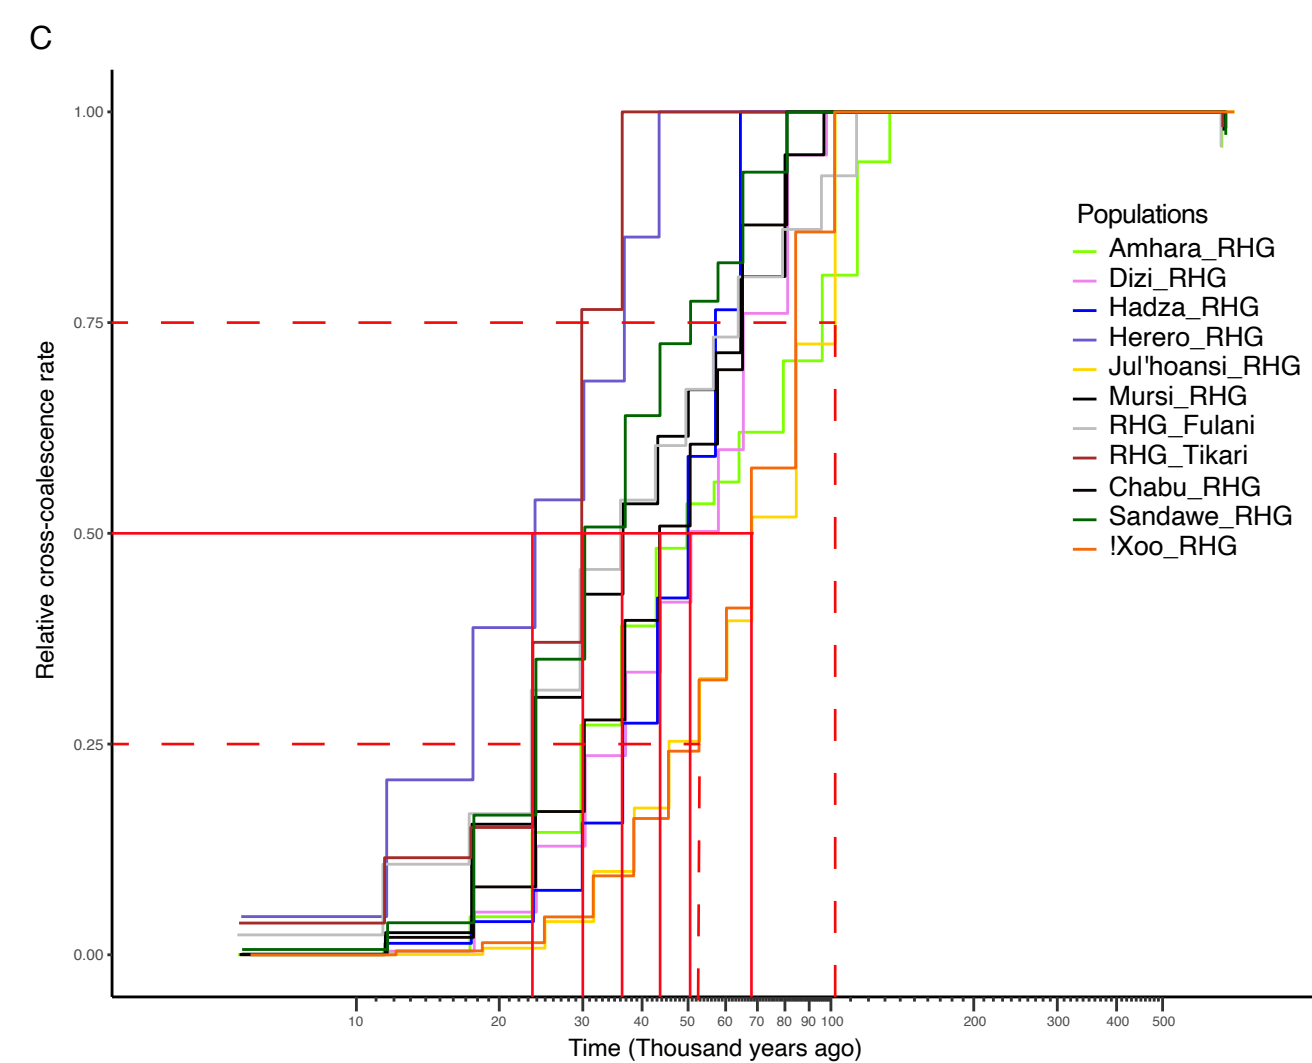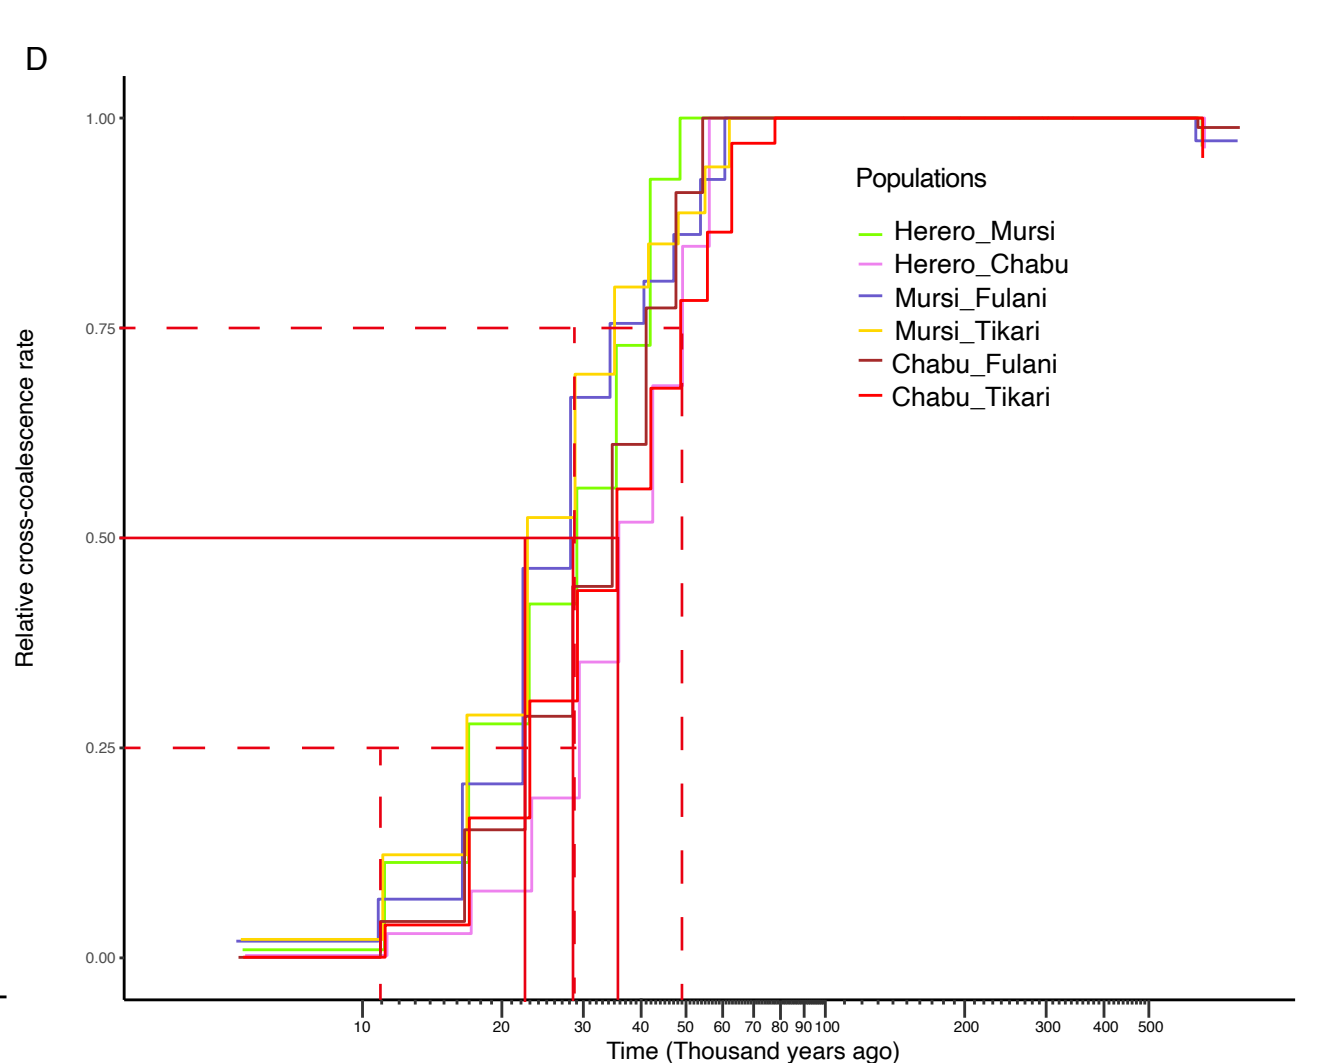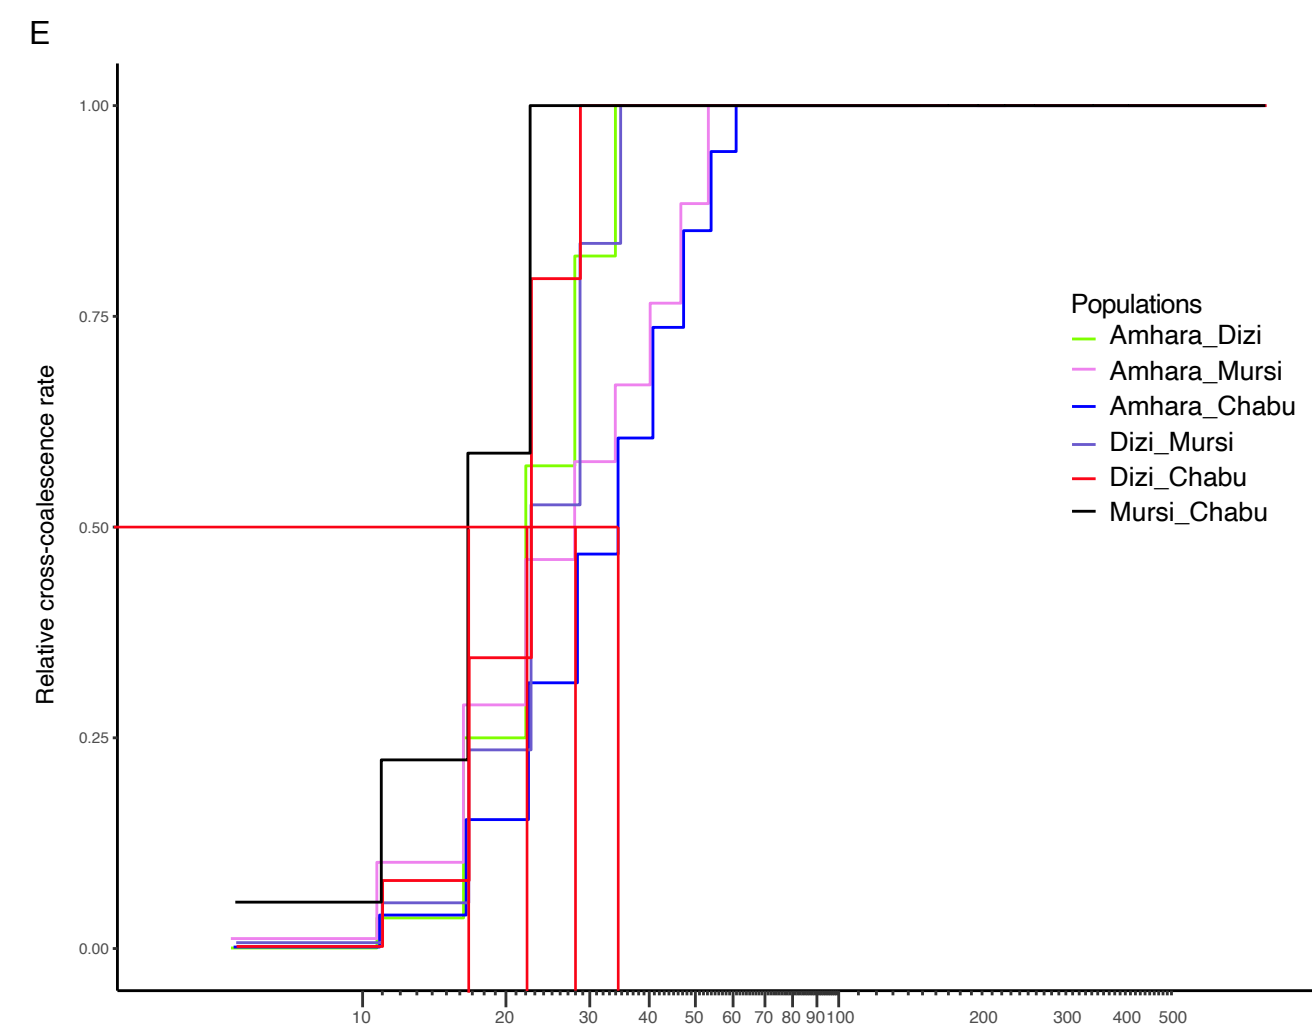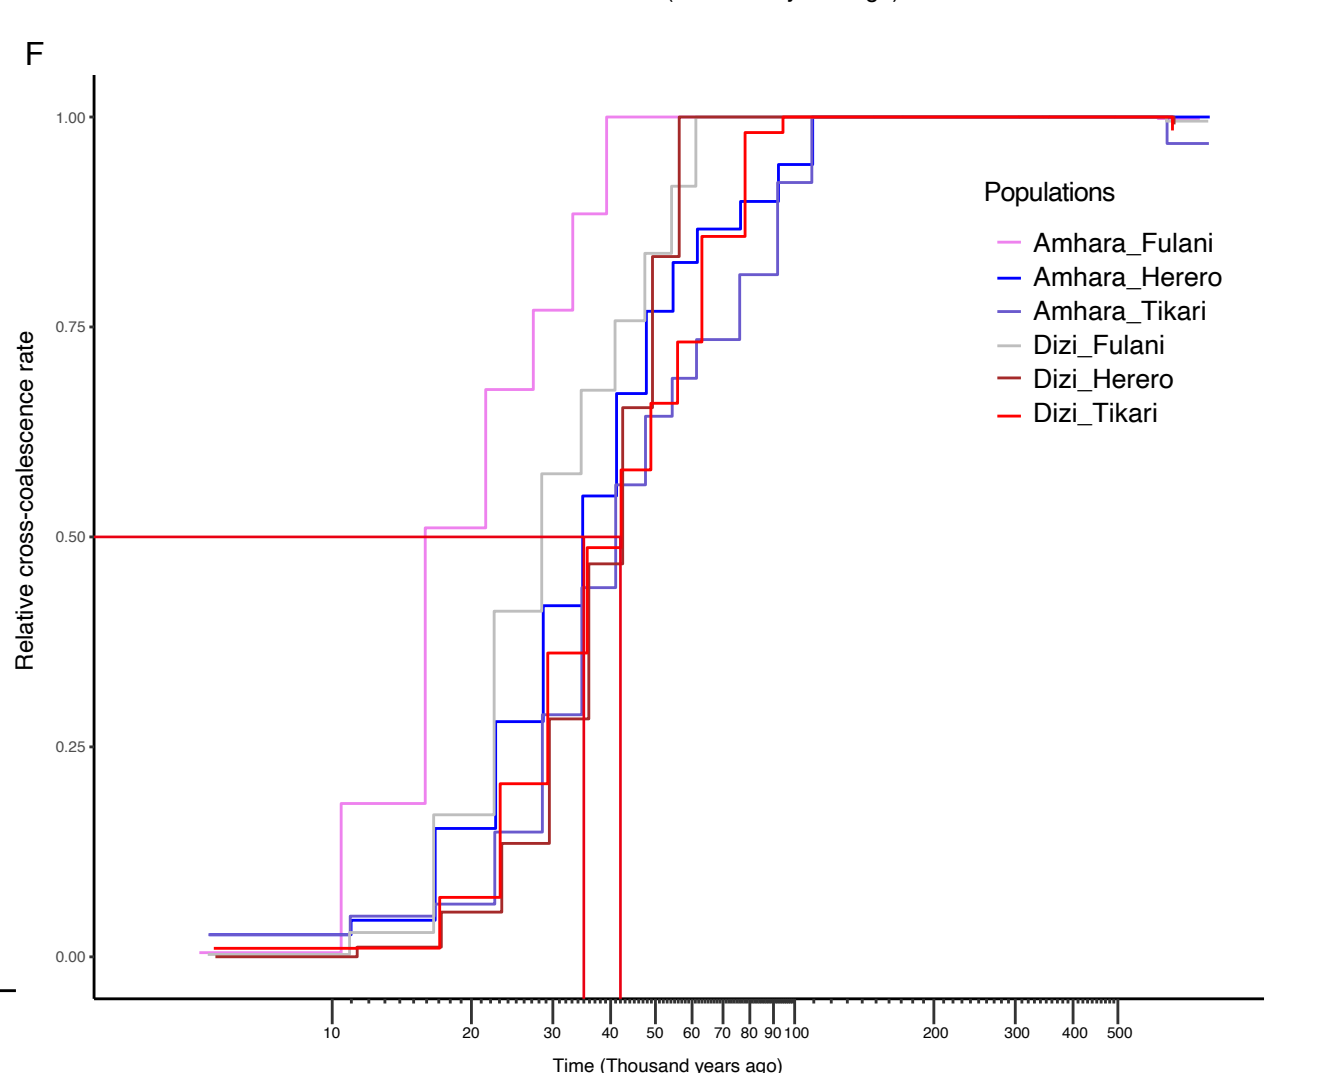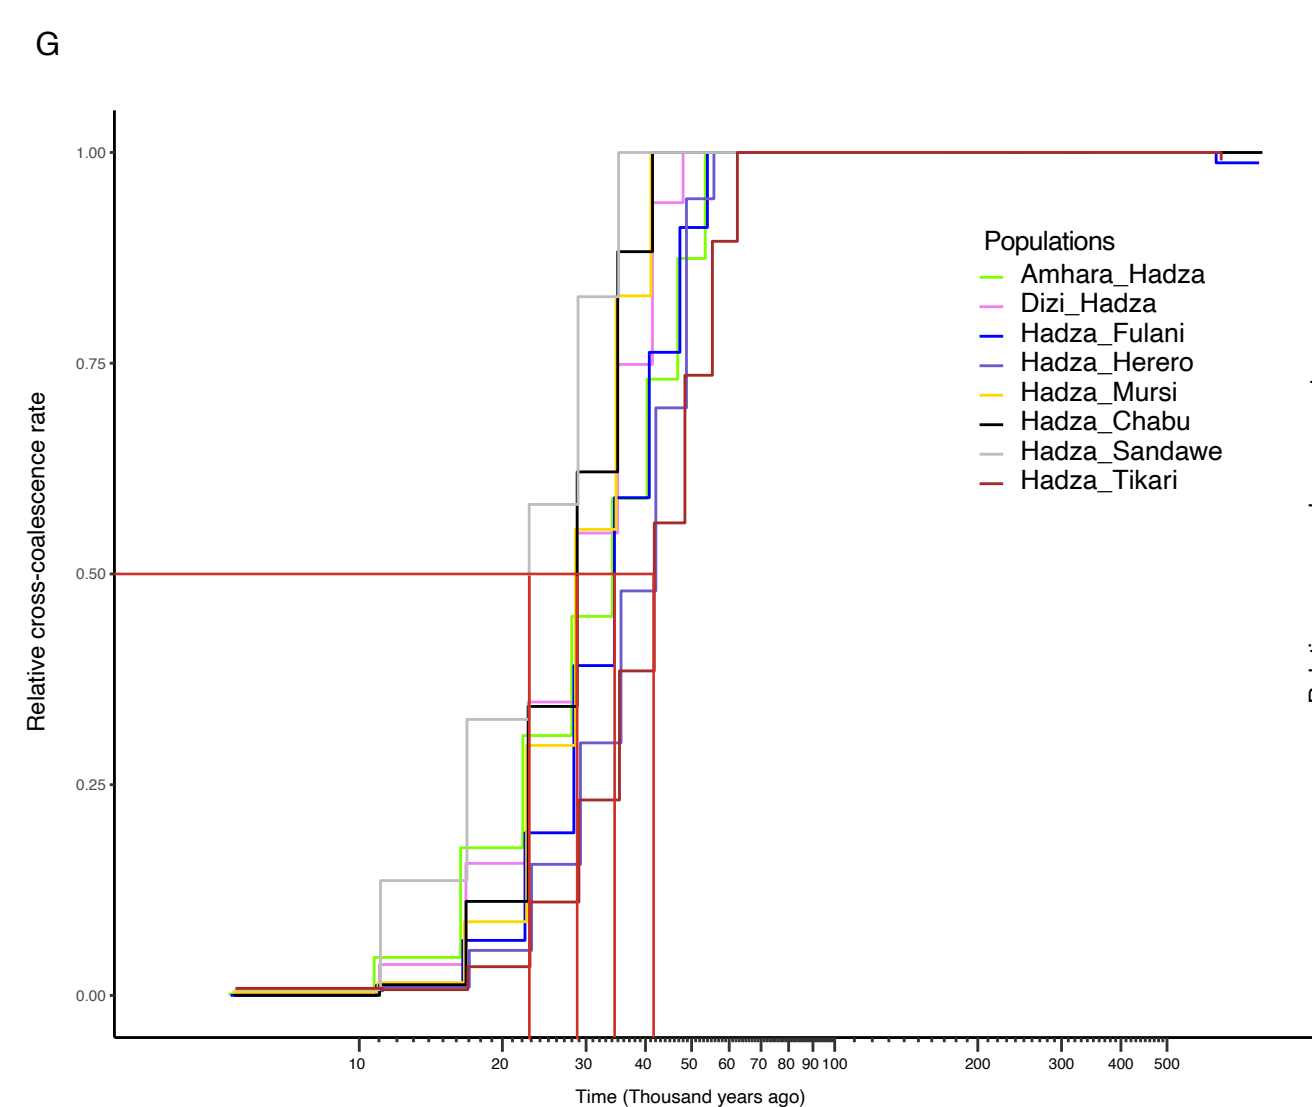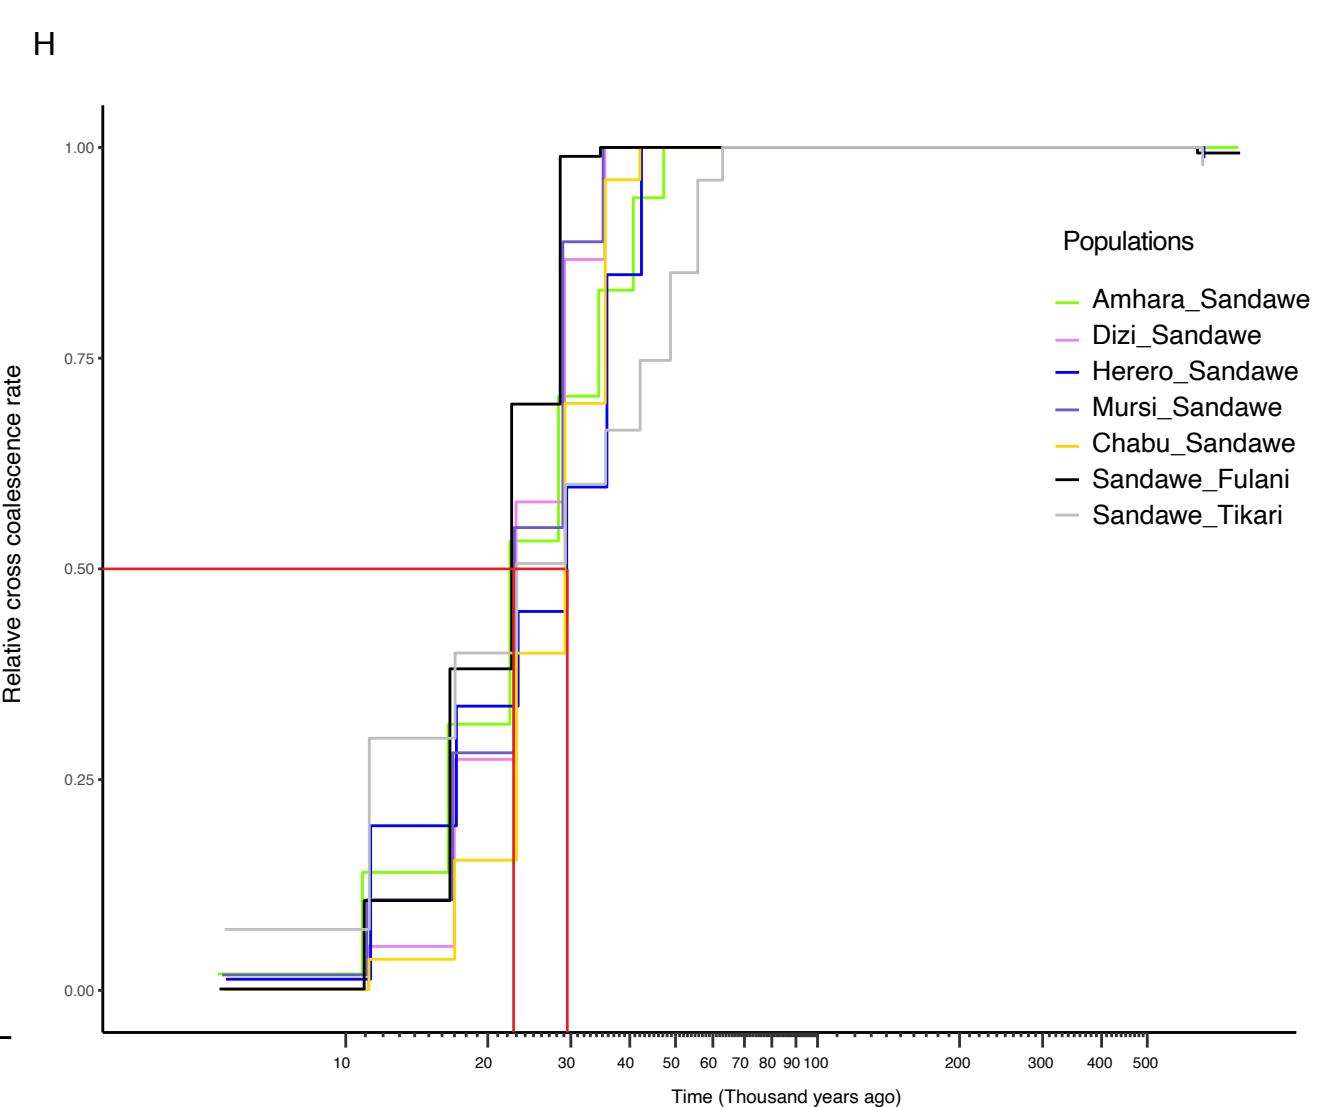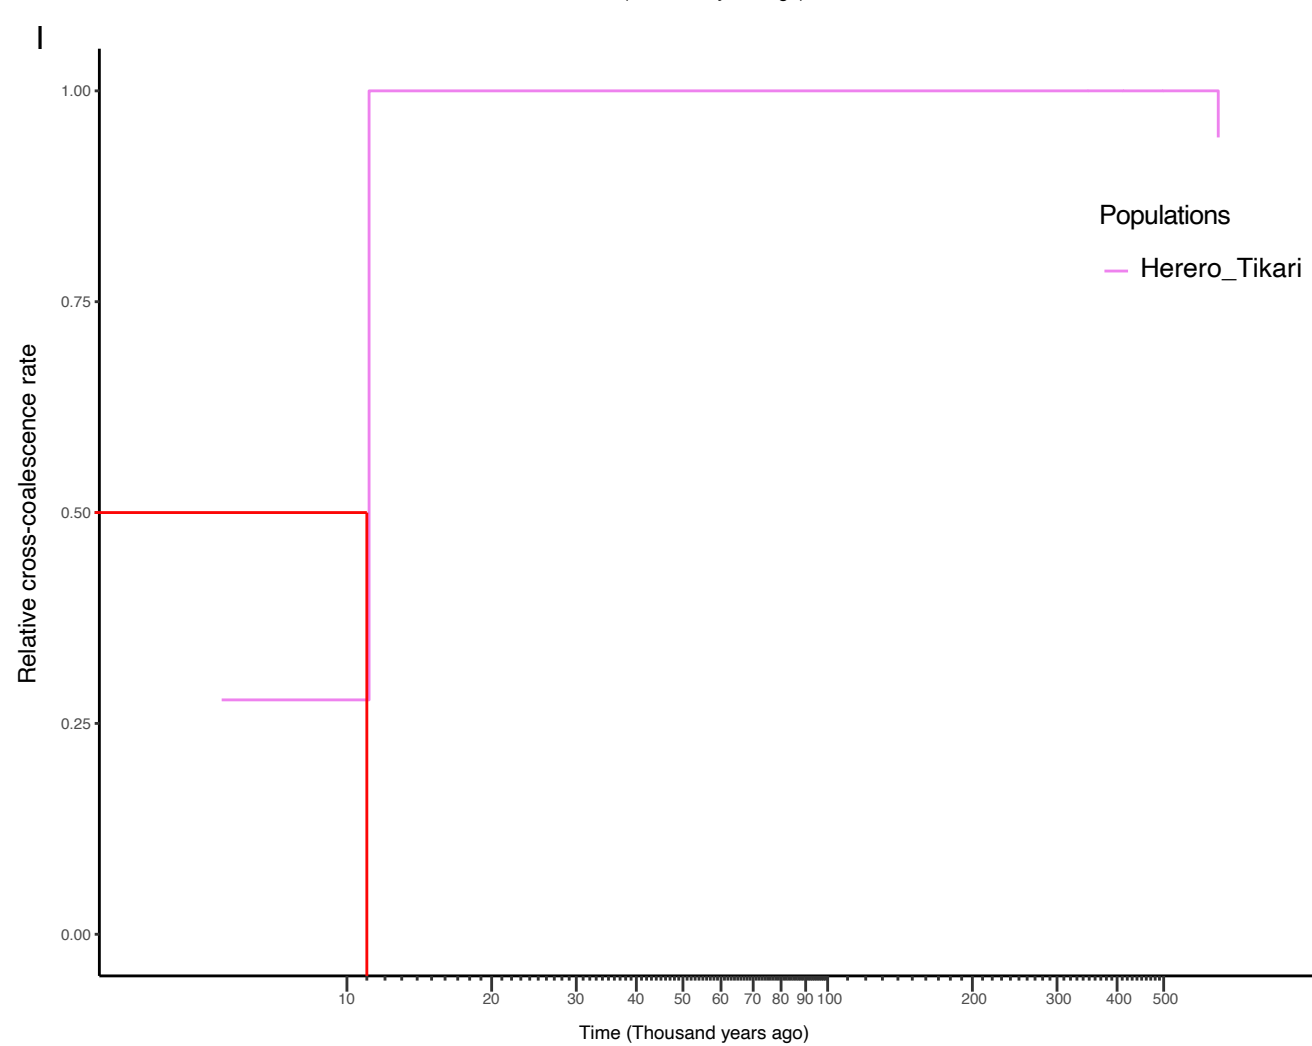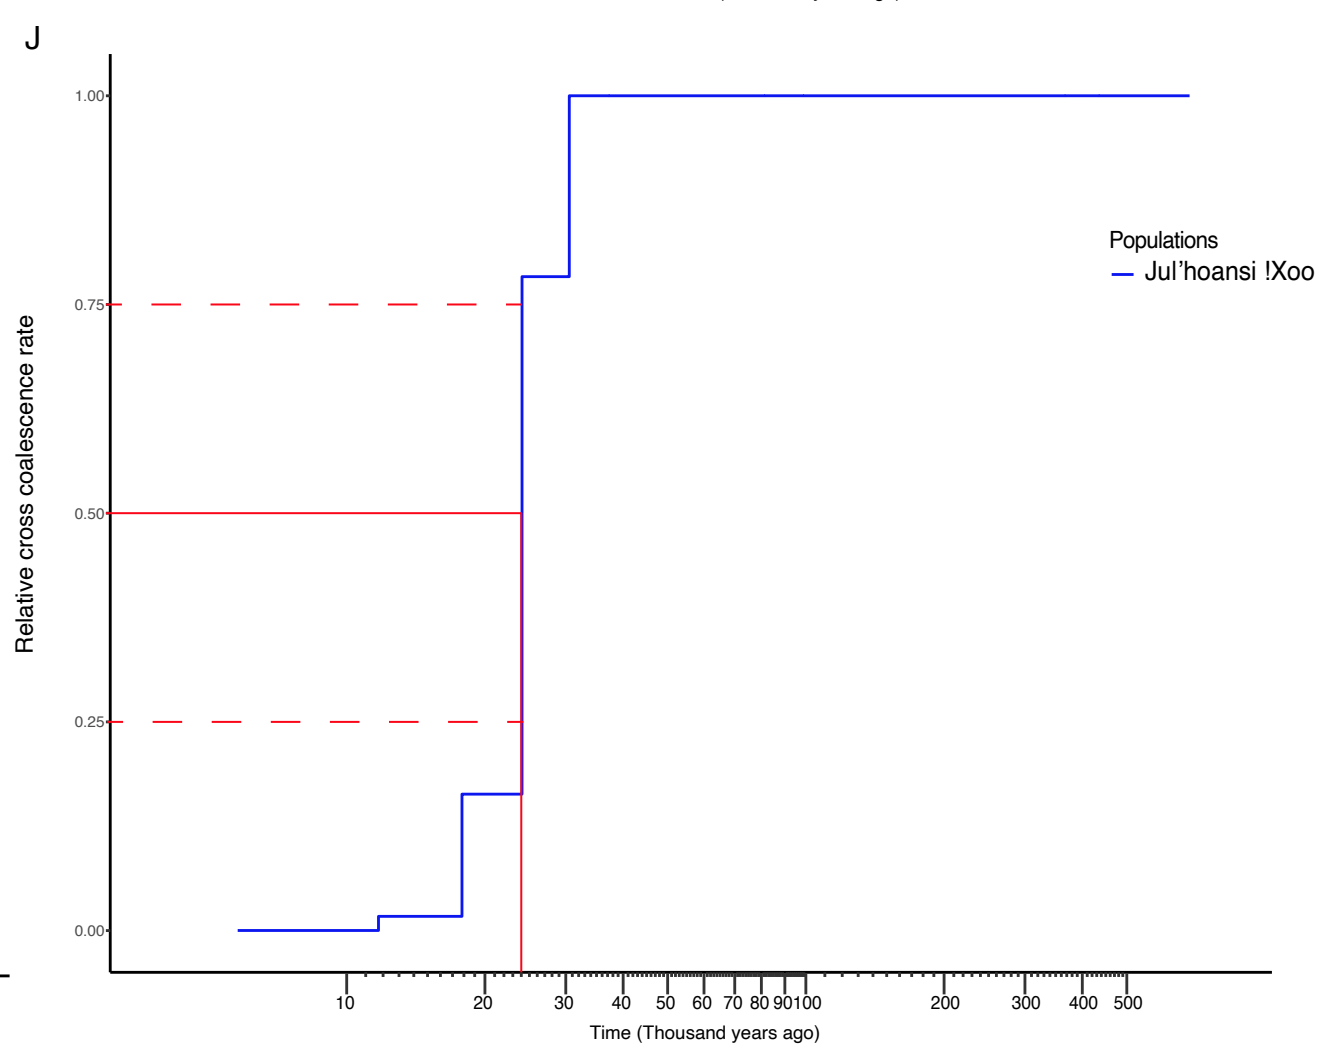

Supplement: NIHMS1878951-supplement-7.pdf [file NIHMS1878951-supplement-7.pdf]

Model 1

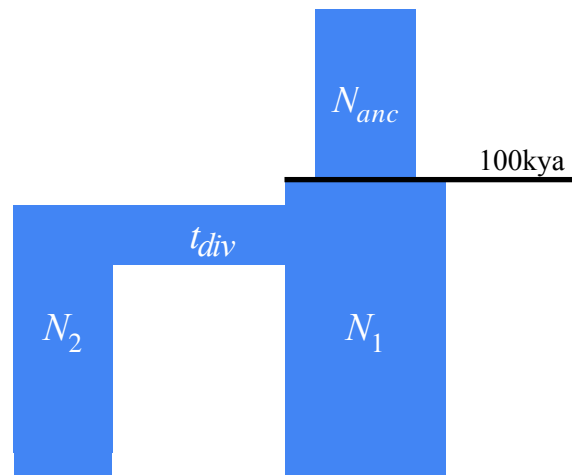

Model 2

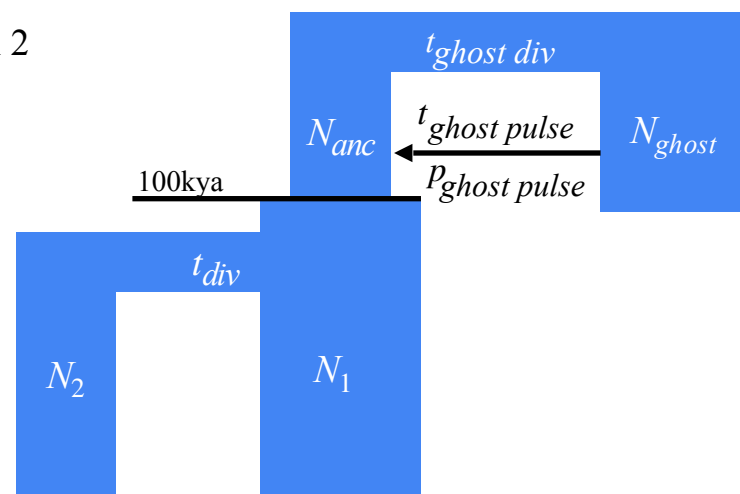

Model 3

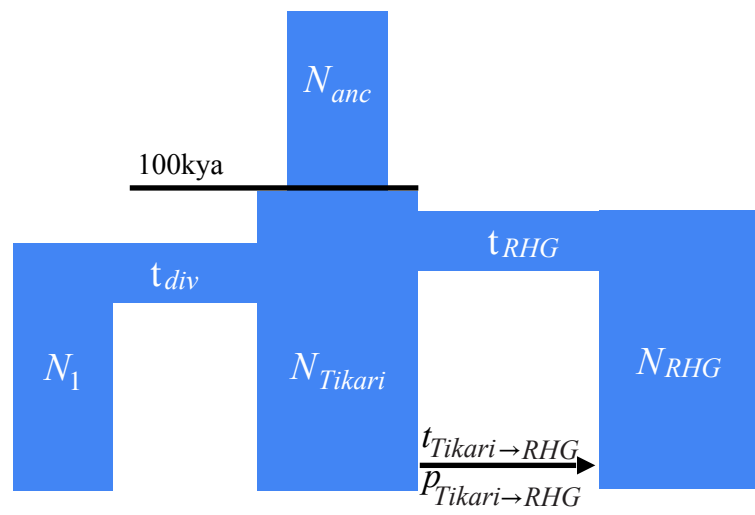

Model 4

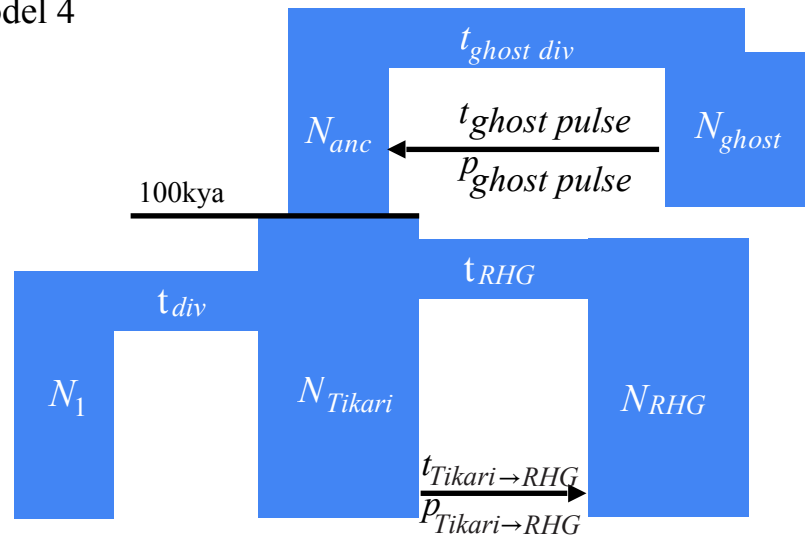

Supplement: NIHMS1878951-supplement-8.pdf [file NIHMS1878951-supplement-8.pdf]
